# Supplementary material for: Unexpected formation of a trinuclear complex containing a Ta(iv)–Ta(iv) bond in the reactions of ButNTa(NMe2)3 with silanes
Source: Royal Society of Chemistry journal article supplement (doi:10.1039/c1cc12837j), 2011-01-01
Supplement: c1cc12837j.pdf [file c1cc12837j.pdf]

# Unexpected formation of a trinuclear complex containing a Ta(IV)-Ta(IV) bond in the reactions of Bu<sup>t</sup>N=Ta(NMe<sub>2</sub>)<sub>3</sub> with silanes

Shu-Jian Chen,<sup>a</sup> Juan Li,<sup>b,c</sup> Brenda A. Dougan,<sup>a</sup> Carlos A. Steren,<sup>a</sup> Xiaoping Wang,<sup>d</sup> Xue-Tai Chen,<sup>e</sup> Zhenyang Lin<sup>\*b</sup> and Zi-Ling Xue<sup>\*a</sup>

## Supplementary information

---

<sup>a</sup> Department of Chemistry, University of Tennessee, Knoxville, Tennessee 37996, USA. Fax: +1 8659743454; E-mail: [xue@utk.edu](mailto:xue@utk.edu)

<sup>b</sup> Department of Chemistry, The Hong Kong University of Science and Technology, Hong Kong, China. E-mail: [chzlin@ust.hk](mailto:chzlin@ust.hk)

<sup>c</sup> Department of Chemistry, Jinan University, Guangzhou, Guangdong 510632, China

<sup>d</sup> Neutron Scattering Science Division, Oak Ridge National Laboratory, Oak Ridge, Tennessee 37831, USA

<sup>e</sup> State Key Laboratory of Coordination Chemistry, School of Chemistry and Chemical Engineering, Nanjing University, Nanjing 210093, China

## Experimental Section and NMR Studies of the Structure of 4

**General procedures.** Unless noted, all manipulations were carried out under a dry and oxygen-free nitrogen atmosphere with the use of glovebox or Schlenk techniques. All solvents were purified by distillation from potassium/benzophenone ketyl. Benzene- $d_6$  and toluene- $d_8$  were dried and stored over activated molecular sieves under nitrogen.  $\text{TaCl}_5$  (Strem),  $\text{LiNMe}_2$  (Aldrich), and  $\text{Me}_3\text{SiCl}$  (Acros) were used as received.  $\text{Bu}^t\text{NH}_2$  (Acros) was refluxed over NaOH and distilled.  $^1\text{H}$ , VT- $^1\text{H}$ ,  $^2\text{H}$ , and  $^{13}\text{C}$  NMR spectra were recorded on a Bruker Avance 400 Fourier transform spectrometer. HMBC, HSQC, and NOESY 2D NMR spectra were recorded on Varian VNMRS 500 MHz spectrometer. FT-IR spectra were recorded on Varian 4100 FT-IR (Excalibur series) spectrometer. Electrochemical cyclic voltammogram (CV) were recorded on (CH Instrument) electrochemical workstation (CHI 650a). UV-Vis spectra were recorded on 8452A diode array spectrophotometer (Hewlett Packard). Elemental analyses were conducted by Complete Analysis Laboratories, Inc., Parsippany, NJ.

### **Preparation of $\text{Ta}_3(\mu\text{-H})(\mu\text{-NMe}_2)(\mu\text{-NBu}^t)_2(=\text{NBu}^t)(\text{NMe}_2)_5$ (2) and $\text{Ta}_2\text{H}_2(\mu\text{-NMe}_2)_2(\text{NMe}_2)_2(=\text{NBu}^t)_2$ (3).**

*Reaction of  $\text{Bu}^t\text{N}=\text{Ta}(\text{NMe}_2)_3$  with  $\text{H}_3\text{SiPh}$ .* To  $\text{Bu}^t\text{N}=\text{Ta}(\text{NMe}_2)_3$  (5.566 g, 14.48 mmol) in toluene (15 mL) in a Schlenk flask (50 mL) with stirring at 23 °C was added 2/3 equiv of  $\text{H}_3\text{SiPh}$  (1.045 g, 9.655 mmol) in toluene (10 mL) in a Schlenk tube in a period of 13 min. The pale-yellow solution turned red immediately, giving off bubbles. After the solution was stirred at 23 °C for another 16 min, volatiles were stripped off in vacuo for 3 h to give a red solid residue. It was dissolved in hexanes to form a clear solution which was concentrated for crystallization at -32 °C. Red crystals (2.060 g, 2.016 mmol, 42% yield based on Ta) of **2** were isolated next day.  $^1\text{H}$  NMR of **2** (benzene- $d_6$ , 399.79 MHz, 23 °C)  $\delta$  7.69 (s, 1H, Ta-H), 3.75 (s, 3H,  $\text{NMe}_a\text{Me}_b$  on Ta1. See Fig. 1 copied below for the atom labeling), 3.18 (s, 24H,  $\text{NMe}_2$ ), 2.87 (s, 3H,  $\mu\text{-NMe}_c\text{Me}_d$ ), 2.78 (s, 3H,  $\mu\text{-NMe}_c\text{Me}_d$ ), 2.30 (s, 3H,  $\text{NMe}_a\text{Me}_b$ ), 1.79 (s, 18H,  $\mu\text{-NCMe}_3$ ), 1.47 (s, 9H,  $\text{NCMe}_3$ ).

$^{13}\text{C}$  NMR of **2** (benzene- $d_6$ , 100.53 MHz, 23 °C)  $\delta$  68.67 (s,  $\mu\text{-NCMe}_3$ ), 64.91 (s,  $\text{NCMe}_3$ ), 53.40 (s,  $\text{NMe}_a\text{Me}_b$ ), 49.86 (s,  $\text{NMe}_2$ ), 48.21 (s,  $\mu\text{-NMe}_2$ ), 37.89 (s,  $\text{NMe}_a\text{Me}_b$ ), 36.13 (s,  $\mu\text{-NCMe}_3$ ), 35.90 (s,  $\text{NCMe}_3$ ).  $^1\text{H}$  NMR of **2** (toluene- $d_8$ , 399.79 MHz, 23 °C)  $\delta$  7.64 (s, 1H, Ta-H), 3.73 (s, 3H,  $\text{NMe}_a\text{Me}_b$ ), 3.18 (s, 24H,  $\text{NMe}_2$ ), 2.89 (s, 3H,  $\mu\text{-NMe}_c\text{Me}_d$ ), 2.77 (s, 3H,  $\mu\text{-NMe}_c\text{Me}_d$ ), 2.29 (s, 3H,  $\text{NMe}_a\text{Me}_b$ ), 1.76 (s, 18H,  $\mu\text{-NCMe}_3$ ), 1.40 (s, 9H,  $\text{NCMe}_3$ ).  $^{13}\text{C}$  NMR of **2** (toluene- $d_8$ , 100.53 MHz, 23 °C)  $\delta$  68.79 (s,  $\mu\text{-NCMe}_3$ ), 65.02 (s,  $\text{NCMe}_3$ ), 53.47 (s,  $\text{NMe}_a\text{Me}_b$ ), 49.93 (s,  $\text{NMe}_2$ ), 48.28 (s,  $\mu\text{-NMe}_2$ ), 37.96 (s,  $\text{NMe}_a\text{Me}_b$ ), 36.18 (s,  $\mu\text{-NCMe}_3$ ), 35.15 (s,  $\text{NCMe}_3$ ). Anal. Calcd for  $\text{C}_{24}\text{H}_{64}\text{N}_9\text{Ta}_3$ : C, 28.21; H, 6.31; N, 12.34. Found: C, 27.90; H, 6.43; N, 12.18.

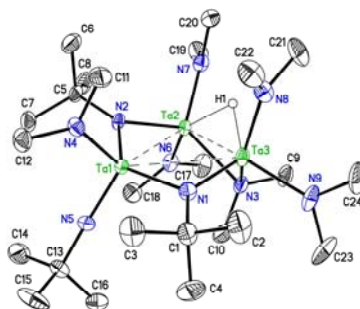

**Fig. 1** ORTEP view of **2** with ellipsoids at 30% probability.

After crystals of **2** were isolated, the supernatant solution was concentrated and put at -32 °C for crystallization. Needle-like colorless crystals of **3** were isolated (310 mg, 0.454 mmol, 6% yield based on Ta).  $^1\text{H}$  NMR of **3** (toluene- $d_8$ , 400.25 MHz, 23 °C)  $\delta$  6.69 (s, 2H, Ta-H), 4.11 (s, 6H,  $\mu\text{-NMe}_a\text{Me}_b$ ), 3.85 (s, 6H,  $\mu\text{-NMe}_a\text{Me}_b$ ), 3.46 (6H,  $\text{NMe}_c\text{Me}_d$ ), 3.45 (6H,  $\text{NMe}_c\text{Me}_d$ ), 1.40 (s, 18H,  $\text{NCMe}_3$ ).  $^{13}\text{C}$  NMR of **3** (toluene- $d_8$ , 100.65 MHz, 23 °C)  $\delta$  64.89 ( $\text{NCMe}_3$ ), 58.59, 57.77, 56.97, 56.67 ( $\text{NMe}_a\text{Me}_b$ ,  $\text{NMe}_a\text{Me}_b$ ,  $\text{NMe}_c\text{Me}_d$ ,  $\text{NMe}_c\text{Me}_d$ ), 35.17 ( $\text{NCMe}_3$ ). Anal. Calcd for  $\text{C}_{16}\text{H}_{44}\text{N}_6\text{Ta}_2$ : C, 28.16; H, 6.50; N, 12.31. Found: C, 28.05; H, 6.59; N, 12.22.

**Reaction of  $\text{Bu}^t\text{N}=\text{Ta}(\text{NMe}_2)_3$  with  $\text{H}_2\text{SiMePh}$ .** Two equiv of  $\text{H}_2\text{SiMePh}$  (0.636 g, 5.60 mmol) in toluene (10 mL) in a Schlenk tube was added to  $\text{Bu}^t\text{N}=\text{Ta}(\text{NMe}_2)_3$  (1.000 g, 2.602 mmol) in toluene (10 mL) in a Schlenk flask (50 mL) with stirring at 23 °C in a period of 13 min. The pale-

yellow solution turned red. After the solution was stirred at 23 °C for another 13 min, volatiles were stripped off in vacuo for 1.5 h to give a red solid residue. It was dissolved in hexanes to form a clear solution which was concentrated for crystallization at -32 °C. Red crystals (0.367 g, 0.359 mmol, 41% yield based on Ta) of **2** were collected next day. Another needle-like colorless crystals of **3** (68 mg, ca 8% yield based on Ta) were collected from the remaining concentrated supernatant solution.

**Preparation of Ta<sub>3</sub>(μ-D)(μ-NMe<sub>2</sub>)(μ=NBu<sup>t</sup>)<sub>2</sub>(=NBu<sup>t</sup>)(NMe<sub>2</sub>)<sub>5</sub> (**2-d<sub>1</sub>**).** To Bu<sup>t</sup>N=Ta(NMe<sub>2</sub>)<sub>3</sub> (0.665 g, 1.730 mmol) in toluene (10 mL) in a Schlenk flask (125 mL) with stirring at 23 °C was added dropwise 2 equiv of D<sub>2</sub>SiMePh (0.430 mg, 3.460 mmol) in toluene (10 mL) dissolved in a Schlenk tube over a period of 13 min. The color of the solution changed to red from pale-yellow slowly. After the solution was stirred at 23 °C for additional 18 min, volatiles were stripped off in vacuo for 1.5 h to give a red viscous residue. The residue was dissolved in hexanes, and the solution was concentrated. Cooling at -32 °C gave red crystals (0.228 g, 0.223 mmol, 39% yield based on Ta) of **2-d<sub>1</sub>** in two days. <sup>1</sup>H NMR of **2-d<sub>1</sub>** (toluene-*d*<sub>8</sub>, 399.71 MHz, 23 °C) δ 3.71 (s, 3H, NMe<sub>a</sub>Me<sub>b</sub>), 3.17 (s, 24H, NMe<sub>2</sub>), 2.88 (s, 3H, μ-NMe<sub>a</sub>Me<sub>b</sub>), 2.77 (s, 3H, μ-NMe<sub>a</sub>Me<sub>b</sub>), 2.27 (s, 3H, NMe<sub>a</sub>Me<sub>b</sub>), 1.75 (s, 18H, μ-NCMe<sub>3</sub>), 1.41 (s, 9H, NCMe<sub>3</sub>). <sup>2</sup>H NMR of **2-d<sub>1</sub>** (toluene-*d*<sub>8</sub>, 61.36 MHz, 23 °C) δ 7.55 (s, 1D, Ta-D). <sup>13</sup>C NMR of **2-d<sub>1</sub>** (toluene-*d*<sub>8</sub>, 100.51 MHz, 23 °C) δ 68.79 (s, μ-NCMe<sub>3</sub>), 65.02 (s, NCMe<sub>3</sub>), 53.43 (s, NMe<sub>a</sub>Me<sub>b</sub>), 49.83 (s, NMe<sub>2</sub>), 48.27 (s, μ-NMe<sub>2</sub>), 37.89 (s, NMe<sub>a</sub>Me<sub>b</sub>), 36.19 (s, μ-NCMe<sub>3</sub>), 35.16 (s, NCMe<sub>3</sub>).

**Preparation of Ta<sub>3</sub>(μ<sub>3</sub>-O)(H)(μ=NBu<sup>t</sup>)(μ-NMe<sub>2</sub>)<sub>2</sub>(NMe<sub>2</sub>)<sub>4</sub>(=NBu<sup>t</sup>)<sub>2</sub> (**4**).** **2** (0.631 g, 0.618 mmol) in toluene (5 mL) in a Schlenk tube was frozen with liquid nitrogen and pumped for 5 min. After liquid nitrogen was removed and the frozen red solid melted, 1 equiv of O<sub>2</sub> (15 mL, 1 atm, 0.618 mmol) was added. The red solution was then stirred for ca. 3 h at 23 °C. The red color faded, giving a yellow solution. The solution was transferred to a smaller Schlenk flask and volatiles were removed to give a yellow viscous residue. Hexanes were added, dissolving the residue for

crystallization at  $-32\text{ }^{\circ}\text{C}$ . Yellow crystals of **4** were isolated in ca. two months (0.102 g, 0.098 mmol, 16% yield).  $^1\text{H}$  NMR of **4** (benzene- $d_6$ , 400.25 MHz,  $23\text{ }^{\circ}\text{C}$ )  $\delta$  6.98 (s, 1H, Ta-H), 4.19 (s, 3H,  $\text{NMe}_i\text{Me}_j$ ), 4.07 (s, 3H,  $\text{NMe}_e\text{Me}_f$ ), 3.62 [s, 6H,  $\text{N}(\text{Me}_a)_2$ ], 3.51 (s, 3H,  $\text{NMe}_e\text{Me}_f$ ), 3.37 (s, 3H,  $\mu\text{-NMe}_c\text{Me}_d$ ), 3.33 (s, 3H,  $\text{NMe}_i\text{Me}_j$ ), 3.32 (s, 3H,  $\mu\text{-NMe}_g\text{Me}_h$ ), 3.31 [s, 6H,  $\text{N}(\text{Me}_b)_2$ ], 3.22 (s, 3H,  $\mu\text{-NMe}_g\text{Me}_h$ ), 2.77 (s, 3H,  $\mu\text{-NMe}_c\text{Me}_d$ ), 1.45 [s, 9H,  $\text{NC}(\text{Me}_m)_3$ ], 1.43 [s, 9H,  $\text{NC}(\text{Me}_l)_3$ ], 1.34 [s, 9H,  $\mu\text{-NC}(\text{Me}_k)_3$ ].  $^{13}\text{C}$  NMR of **4** (benzene- $d_6$ , 100.65 MHz,  $23\text{ }^{\circ}\text{C}$ )  $\delta$  63.15 [s,  $\text{NC}(\text{Me}_l)_3$ ], 62.27 [s,  $\text{NC}(\text{Me}_m)_3$ ], 59.69 [s,  $\mu\text{-NC}(\text{Me}_k)_3$ ], 57.57 (s,  $\text{NMe}_i\text{Me}_j$ ), 57.30 (s,  $\text{NMe}_e\text{Me}_f$ ), 56.18 (s,  $\mu\text{-NMe}_g\text{Me}_h$ ), 53.80 (s,  $\mu\text{-NMe}_c\text{Me}_d$ ), 51.72 (s,  $\mu\text{-NMe}_g\text{Me}_h$ ), 50.31 [s,  $\text{N}(\text{Me}_a)_2$ ], 48.11 [s,  $\text{N}(\text{Me}_b)_2$ ], 47.72 (s,  $\text{NMe}_i\text{Me}_j$ ), 47.60 (s,  $\text{NMe}_e\text{Me}_f$ ), 44.92 (s,  $\mu\text{-NMe}_c\text{Me}_d$ ), 34.92 [s,  $\text{NC}(\text{Me}_m)_3$ ], 34.39 [s,  $\text{NC}(\text{Me}_l)_3$ ], 30.22 [s,  $\mu\text{-NC}(\text{Me}_k)_3$ ]. Anal. Calcd for  $\text{C}_{24}\text{H}_{64}\text{N}_9\text{OTa}_3$ : C, 27.78; H, 6.22; N, 12.15. Found: C, 27.69; H, 6.12; N, 12.11.

NMR studies give the structure of **4** in Chart 1. After 2D HSQC (Fig. S8) was used to establish the correlations between  $^1\text{H}$  and  $^{13}\text{C}$  atoms that are bound to each other,<sup>5</sup> HMBC (Fig. S9 and S10) provided correlations between: (1) protons of one Me group and the C atom of the other Me group in the same  $\text{-NMe}_2$  ligand - the H and C atoms are three bonds away; (2) the hydride ligand and vicinal C atoms with dihedral angles of ca.  $180^{\circ}$  (and thus strong couplings).<sup>S1</sup> These C atoms are the  $\text{Me}_d$  and  $\text{Me}_a$  groups (Fig. S10). No correlation between the hydride ligand and the  $\text{Me}_e$  (or  $\text{Me}_f$ ) group was observed, and the HMBC spectrum (Fig. S10) showed only a weak peak between the hydride and the  $\text{Me}_g$  group. The HMBC spectrum and the much longer H1-Ta1 distance in the structure of **4** discussed above point to either a terminal hydride ligand or an unsymmetrical bridging hydride that binds much more strongly with Ta2 than with Ta1. The NOESY spectrum reveals H atoms that are spatially close, and it (Fig. S11-S13) indicates that the hydride ligand is close to the  $\text{Me}_a$ ,  $\text{Me}_c$ ,  $\text{Me}_g$ , and  $\text{Me}_m$  groups.

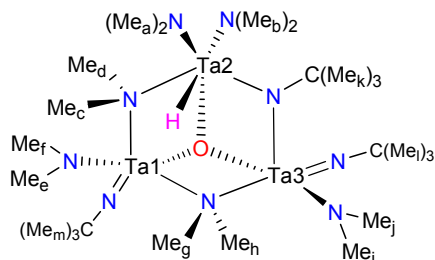

**Chart 1.** Structure of **4** based on 1D and 2D NMR studies.

**FT-IR measurement of **2** and **2-d<sub>1</sub>**.** KBr (96.4 mg) pellet was prepared under nitrogen atmosphere and scanned as background. **2** (2 mg) was ground with KBr (96.4 mg) and pressed into a pellet. A broad band of Ta-H stretch was observed at  $1628\text{ cm}^{-1}$  (Fig. S3). The IR sample of **2-d<sub>1</sub>** (2 mg) was similarly prepared and its spectrum is given in Fig. S3. The Ta-D stretch was obscured by other peaks.

**Electrochemical cyclic voltammogram (CV) of **2**.** In a glovebox, 0.10 M of  $(\text{Bu}^n_4\text{N})\text{PF}_6$  (electrolyte, 387.4 mg, 1.00 mmol) and 1.0 M of **2** (10.2 mg, 10 mmol) were made in  $\text{CHCl}_3$  (10 mL) in a cell with three electrodes (working electrode: glassy carbon; counter electrode: platinum wire; reference electrode: Ag/AgCl wire). The cell was then put into an Erlenmeyer flask (1000 mL) with a rubber stopper. Three wires went through the stopper for power connection. The whole set-up was taken out the glove box and quickly connected to a CHI electrochemical workstation. Two peaks at -0.089 and 0.22 V during the oxidation (Fig. S5) are consistent with the presence of a Ta-Ta bond in **2**. The oxidation is essentially irreversible.

**UV-Vis measurement of **2**.** **2** (9.1 mg,  $8.9\ \mu\text{mol}$ ) was dissolved in hexanes (4.0 mL) to form a red solution. Part of the solution (0.4 mL) was transferred into a cuvette and additional hexanes (4 mL) was added to the cuvette to give a final solution (0.202 mM) for UV-Vis measurement. Another cuvette loaded with hexanes (4.4 mL) was prepared as background. The sample was scanned for three times. The spectra are given in Fig. S7.

The new complex **2** is red.  $d^0$  complexes are usually colorless or lightly colored as a result of their UV absorption. The absorption at 450 nm suggests the presence of d electrons in **2**.

**Determination of X-ray crystal structures of 2 and 4.** The data for the X-ray crystal structures of **2** and **4** were collected on a Bruker-AXS APEX diffractometer equipped with a CCD area detector fitted with an upgraded Nicolet LT-2 low temperature device. The data were obtained using a graphite-monochromated Mo source ( $K_{\alpha}$  radiation, 0.71073 Å). Suitable crystals were coated with paratone oil (Exxon) and mounted on loops under a stream of nitrogen at the data collection temperature. The structures were solved by direct methods. Non-hydrogen atoms were anisotropically refined. All hydrogen atoms were treated as idealized contributions. Empirical absorption correction was performed with SADABS.<sup>S2a</sup> In addition the global refinements for the unit cells and data reductions of the structure was performed using the Saint program (version 6.02). All calculations were performed using SHELXTL (version 5.1) proprietary software package.<sup>S2b</sup>

**Computational details.** In the isolated trinuclear Ta cluster complex **2**, a Ta(IV)-Ta(IV) bond can be formally assigned. To better understand the nature of the Ta-Ta bonding interactions, we carried out density functional theory calculations at the B3LYP level. In our calculations, *tert*-butyl groups were replaced by CH<sub>3</sub>. Important structural parameters calculated for the model cluster complex **2A** are shown in Fig. 2, together with the experimental ones obtained from the X-ray diffraction study. The calculated geometry reproduced well the experimental structure. Overall, the metal-ligand bonds were better reproduced while the metal-metal bonds were slightly overestimated. The shorter bond of Ta(2)-Ta(3) versus Ta(1)-Ta(2)/Ta(1)-Ta(3) was also well reproduced.

The highest occupied molecular orbital (HOMO) shown in Fig. 4 illustrates the metal-metal bonding interactions in the trinuclear Ta cluster complex. Interestingly, the two metal d electrons in the cluster complex occupy an orbital that delocalizes significantly onto the three

metal centers. On the basis of the calculation results, we conclude a three-center-two-electron bond for the trinuclear Ta cluster complex.

Fig. 4 also shows the plot of the lowest unoccupied molecular orbital (LUMO). The LUMO shows a bonding interaction between d orbitals of Ta(2) and Ta(3). Clearly, d-d transition is responsible for the absorption peak at 450 nm observed in the visible spectrum (Fig. S7). The time-dependent B3LYP (TD-B3LYP) calculation gives the lowest excited state at a wavelength of 494 nm, a value close to the experimentally observed one.

Molecular geometry of the trinuclear Ta cluster complex **2**, in which the *tert*-butyl groups were modeled by CH<sub>3</sub>, was optimized at the Becke3LYP level of density functional theory.<sup>S3</sup> The Ta atom was described using the LANL2DZ basis set with the Hay and Wadt effective core potential (ECP).<sup>S4</sup> The 6-31G basis set was used for other atoms.<sup>S5</sup> All calculations were performed with Gaussian 03 packages.<sup>S6</sup>

To test the basis set dependence of the calculated Ta-Ta bond distances, we also employed the SDD basis set<sup>S7</sup> with Stuttgart potentials for Ta to carry out the geometry optimization for the trinuclear Ta cluster complex **2A**, a model for **2**. Comparison of the calculated bond distances obtained based on the LANL2DZ and SDD basis sets was made (Fig. S1). Both basis sets reproduce well the experimental structure. The LANL2DZ basis gives slightly better results in reproducing the Ta-Ta distances.



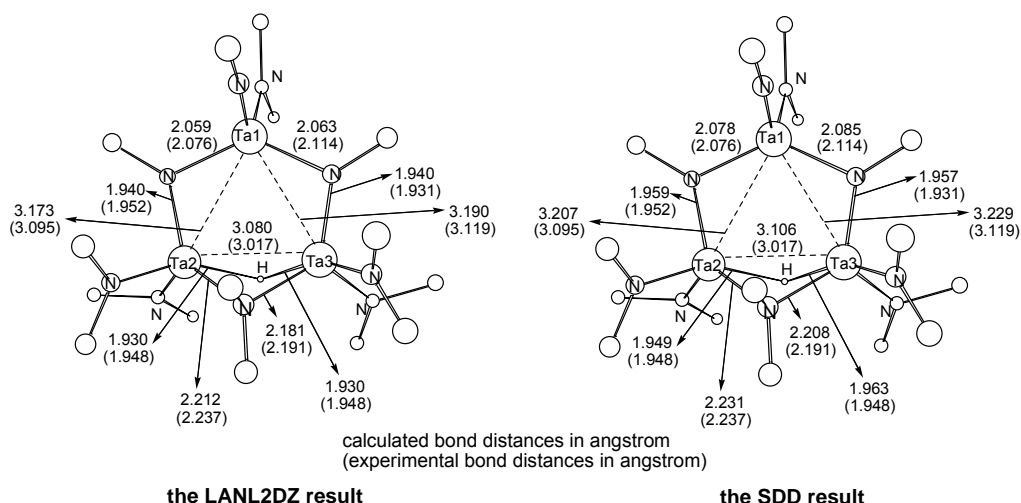

**Fig. S1** Comparison of the results using the LANL2DZ and SDD basis sets.

## References

- (S1) For the dependence of vicinal couplings on dihedral angles, see, e.g., H. Friebolin, in *Basic One- and Two-Dimensional NMR Spectroscopy*, Wiley-VCH, Weinheim, 2005, pp. 90-93.
- (S2) (a) G. M. Sheldrick, *SADABS, A Program for Empirical Absorption Correction of Area Detector Data*; University of Göttingen, Göttingen, Germany, 2000; (b) G. M. Sheldrick, *SHELXL-97, A Program for the Refinement of Crystal Structures*, University of Göttingen, Göttingen, Germany, 1997.
- (S3) (a) A. D. Becke, *J. Chem. Phys.* 1993, **98**, 5648; (b) C. Lee, W. Yang and R. G. Parr, *Phys. Rev. B* 1988, **37**, 785; (c) P. J. Stephens, F. J. Devlin, C. F. Chabalowski and M. J. Frisch, *J. Phys. Chem.* 1994, **98**, 11623.
- (S4) (a) P. J. Hay and W. R. Wadt, *J. Chem. Phys.* 1985, **82**, 299; (b) W. R. Wadt and P. J. Hay, *J. Chem. Phys.* 1985, **82**, 284.
- (S5) P. C. Hariharan and J. A. Pople, *Theor. Chim. Acta* 1973, **28**, 213.
- (S6) M. J. Frisch, G. W. Trucks, H. B. Schlegel, G. E. Scuseria, M. A. Robb, J. R. Cheeseman, J. A. Montgomery, T., Jr. Vreven, K. N. Kudin, J. C. Burant, J. M. Millam, S. S. Iyengar, J. Tomasi, V. Barone, B. Mennucci, M. Cossi, G. Scalmani, N. Rega, G. A. Petersson, H.

Nakatsuji, M. Hada, M. Ehara, K. Toyota, R. Fukuda, J. Hasegawa, M. Ishida, T. Nakajima, Y. Honda, O. Kitao, H. Nakai, M. Klene, X. Li, J. E. Knox, H. P. Hratchian, J. B. Cross, C. Adamo, J. Jaramillo, R. Gomperts, R. E. Stratmann, O. Yazyev, A. J. Austin, R. Cammi, C. Pomelli, J. W. Ochterski, P. Y. Ayala, K. Morokuma, G. A. Voth, P. Salvador, J. J. Dannenberg, V. G. Zakrzewski, S. Dapprich, A. D. Daniels, M. C. Strain, O. Farkas, D. K. Malick, A. D. Rabuck, K. Raghavachari, J. B. Foresman, J. V. Ortiz, Q. Cui, A. G. Baboul, S. Clifford, J. Cioslowski, B. B. Stefanov, G. Liu, A. Liashenko, P. Piskorz, I. Komaromi, R. L. Martin, D. J. Fox, T. Keith, M. A. Al-Laham, C. Y. Peng, A. Nanayakkara, M. Challacombe, P. M. W. Gill, B. Johnson, W. Chen, M. W. Wong, C. Gonzalez and J. A. Pople, *Gaussian 03*, Revision D01; Gaussian, Inc.: Pittsburgh, PA, 2003.

(S7) (a) A. Bergner, M. Dolg, W. Kuechle, H. Stoll and H. Preuss, *Mol. Phys.* 1993, **80**, 1431; (b) M. Dolg, U. Wedig, H. Stoll and H. Preuss, *J. Chem. Phys.* 1987, **86**, 866.

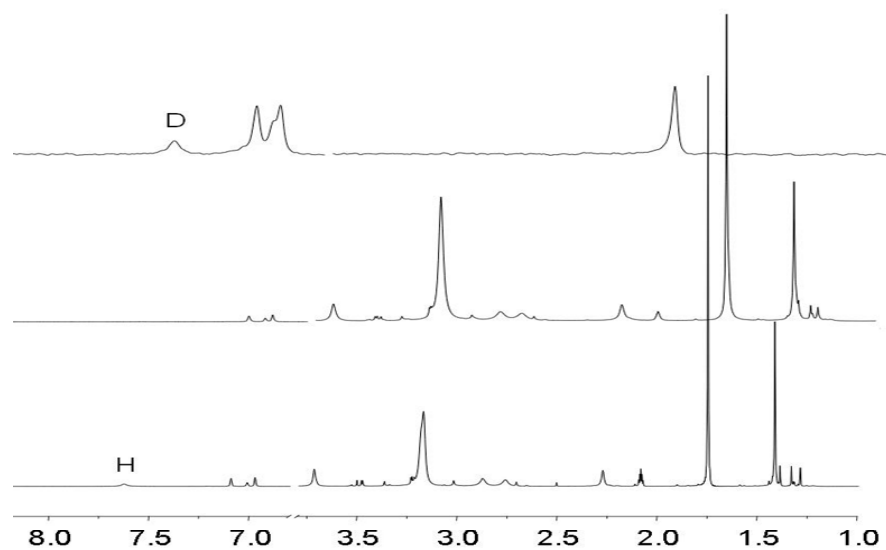

**Fig. S2**  $^1\text{H}$  NMR spectrum of **2** (bottom) and **2- $d_1$**  (middle) in  $\text{toluene-}d_8$ .  $^2\text{H}$  NMR spectrum of **2- $d_1$**  (top) in toluene. All were acquired at 23 °C.

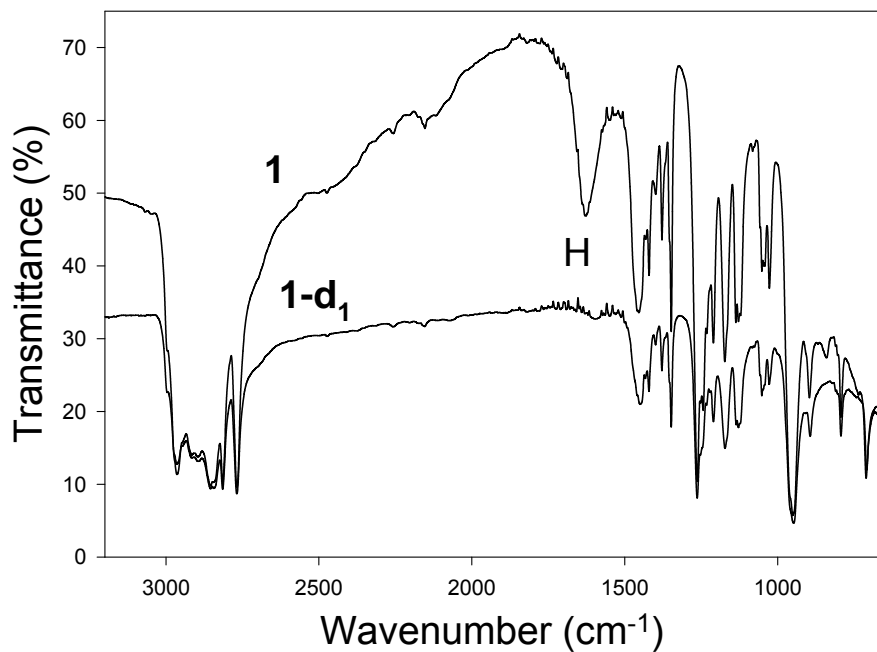

**Fig. S3** FT-IR spectra of **2** (top) and **2- $d_1$**  (bottom).

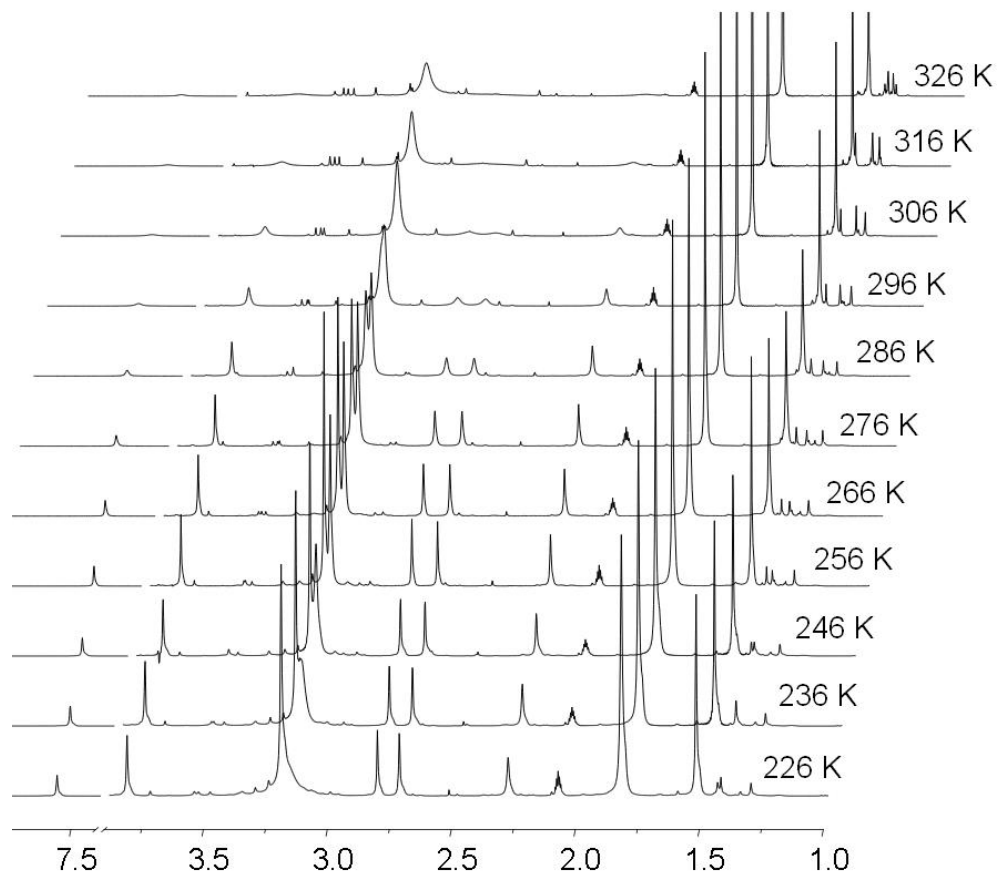

**Fig. S4** Variable-temperature  $^1\text{H}$  NMR spectra of **2** (226-326 K).

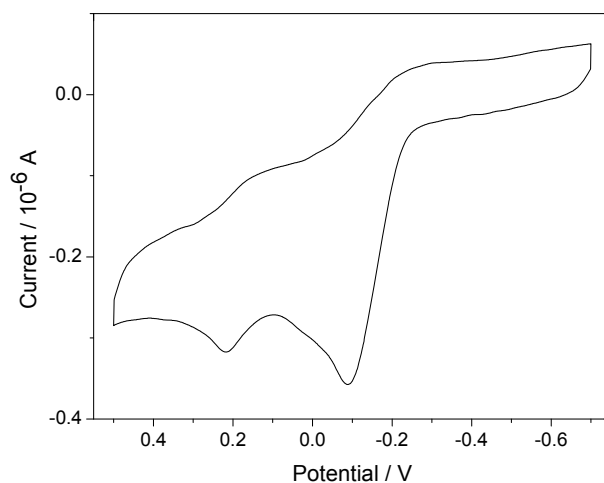

**Fig. S5** Cyclic voltammetry (CV) showing irreversible oxidation of **2** at -0.089 and 0.22 V (vs. Ag/AgCl). For the CV experiment: [**2**]: 1.0 mM; solvent: HCCl<sub>3</sub>; electrolyte: 0.10 M (Bu<sup>n</sup><sub>4</sub>N)PF<sub>6</sub>; scan rate: 100 mV/s (working electrode: glassy carbon; reference electrode: Ag/AgCl; counter electrode: Pt).

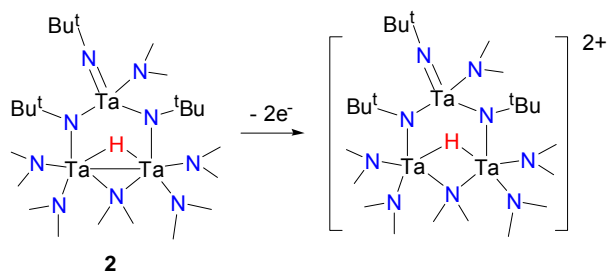

**Fig. S6** Postulated oxidation of **2** in the CV experiments.

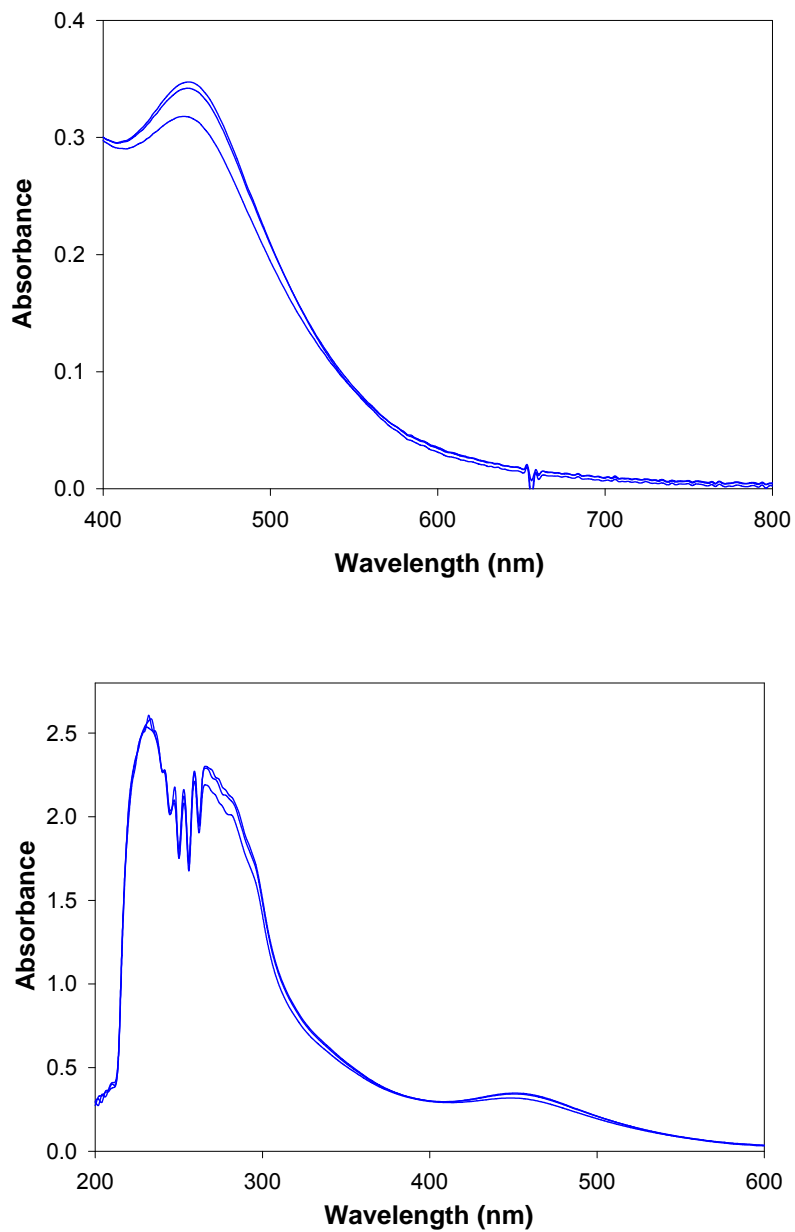

**Fig. S7** UV-Vis spectrum of **2** (0.202 mM in hexanes). Up: 400-800 nm; Bottom: 200-600 nm. Three scans were obtained of the sample, and the three spectra are given.

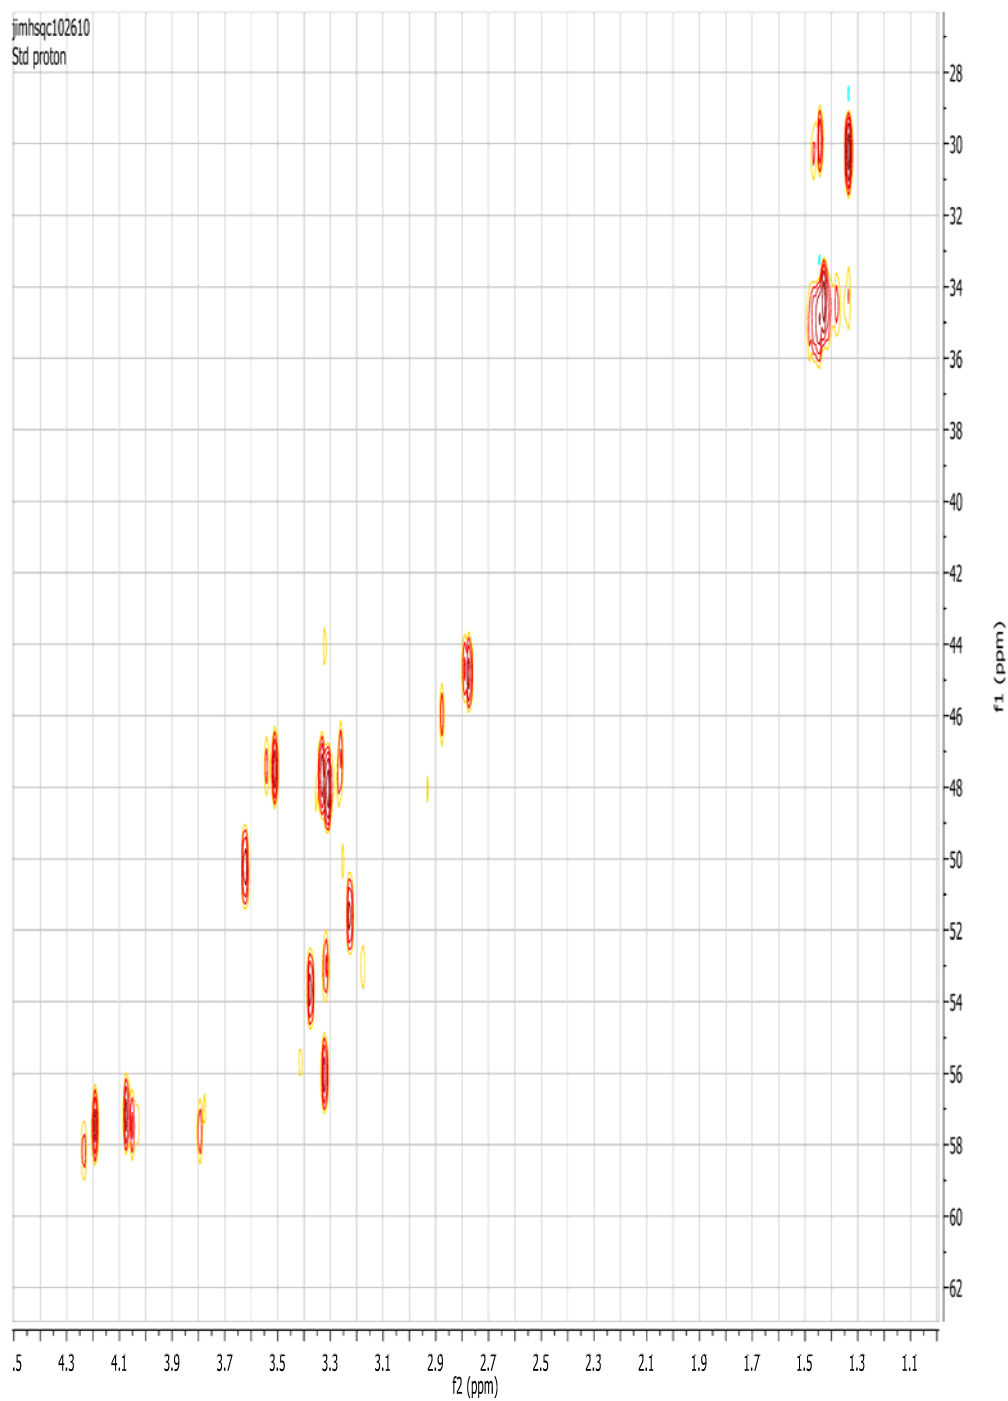

**Fig. S8** HSQC (Heteronuclear Single Quantum Coherence) spectrum of **4** (benzene- $d_6$ , 26 °C). It gives the correlation between  $^1\text{H}$  and  $^{13}\text{C}$  atoms that are bound to each other. f1 and f2 are  $^{13}\text{C}$  and  $^1\text{H}$  NMR axes, respectively.

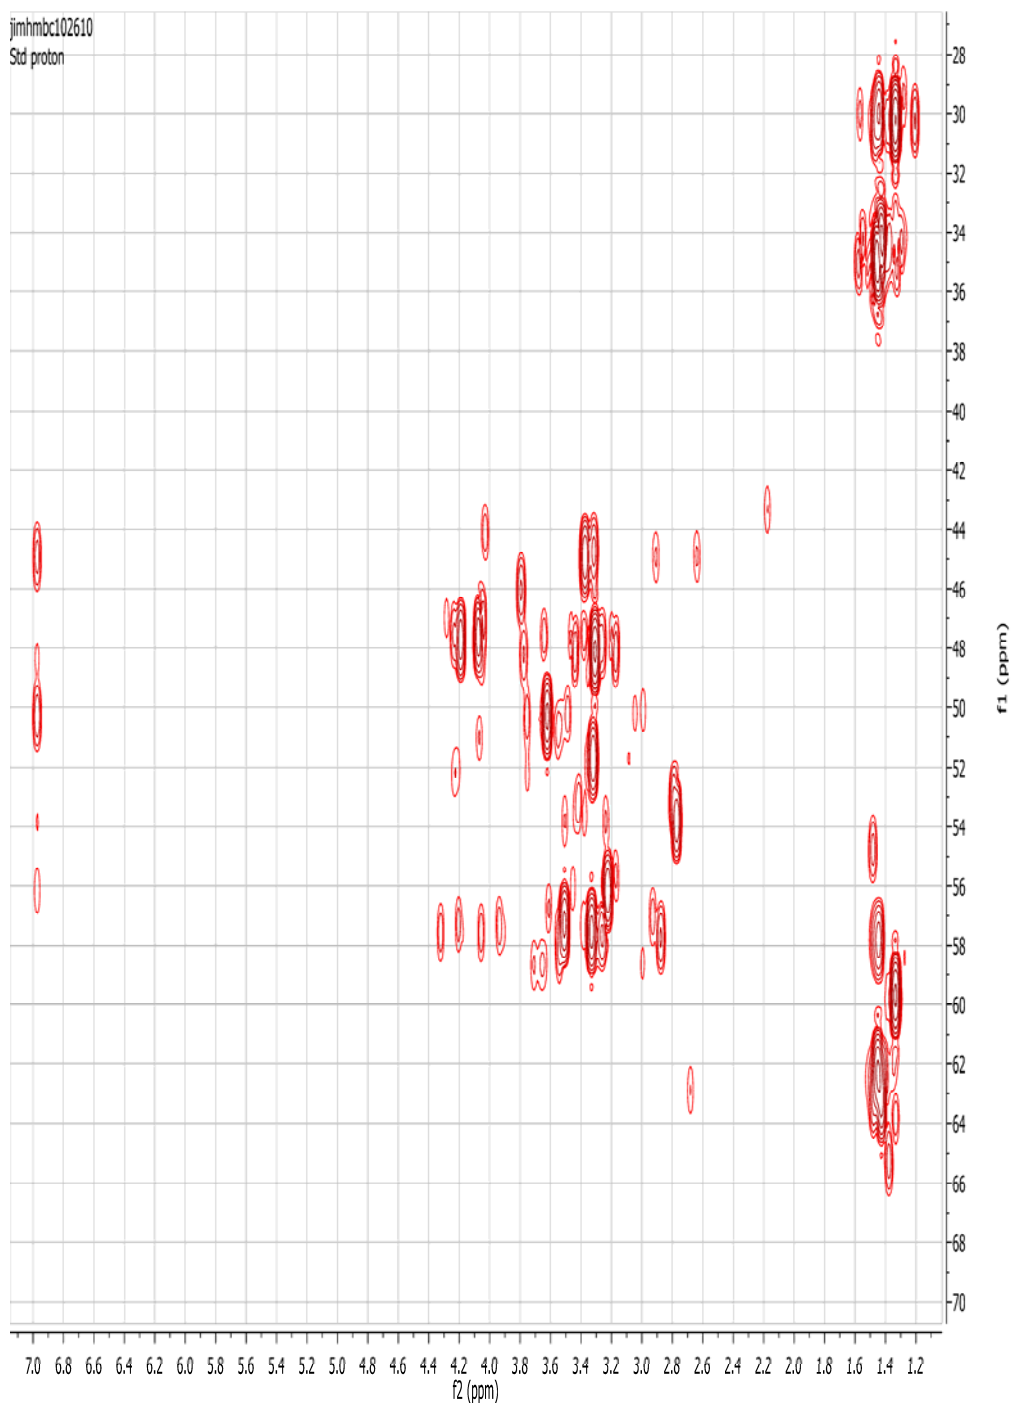

**Fig. S9** HMBC (Heteronuclear Multiple Bond Correlation) spectrum of **4** (benzene- $d_6$ , 26 °C), providing correlations between protons and carbons over two and three bonds.

This spectrum reveals the correlations of: (1) Protons of one Me group with the C atom of the other Me group in the same  $-NMe_2$  ligand - The H and C atoms are three bonds away; (2) Hydride ligand with vicinal C atoms (three bonds away) with dihedral angles of ca.  $180^\circ$ .<sup>11</sup> f1 and f2 are  $^{13}C$  and  $^1H$  NMR axes, respectively.



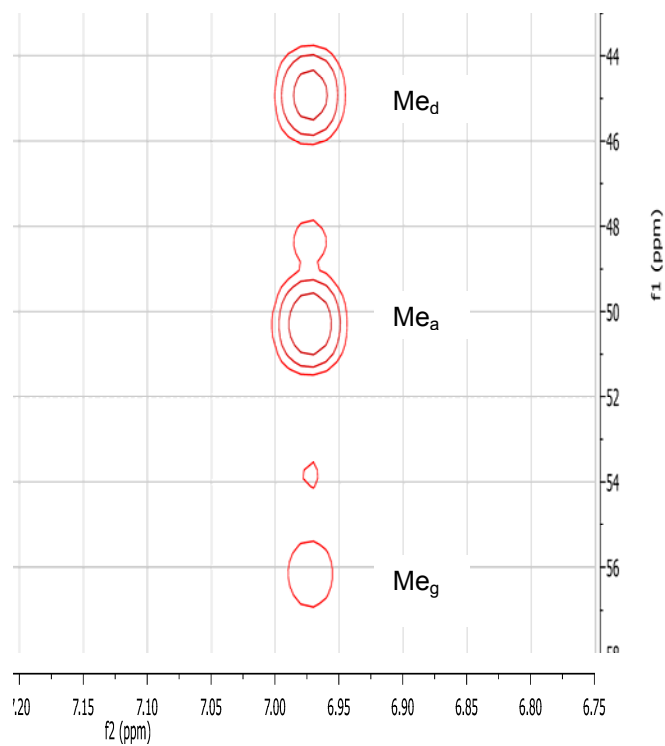

**Fig. S10** HMBC spectrum of **4** (benzene- $d_6$ , 26 °C) around the hydride region. f1 and f2 are  $^{13}\text{C}$  and  $^1\text{H}$  NMR axes, respectively. This portion of the spectrum highlights the correlations of the hydride ligand with vicinal C atoms (three bonds away) with dihedral angles of ca.  $180^\circ$ .<sup>11</sup>

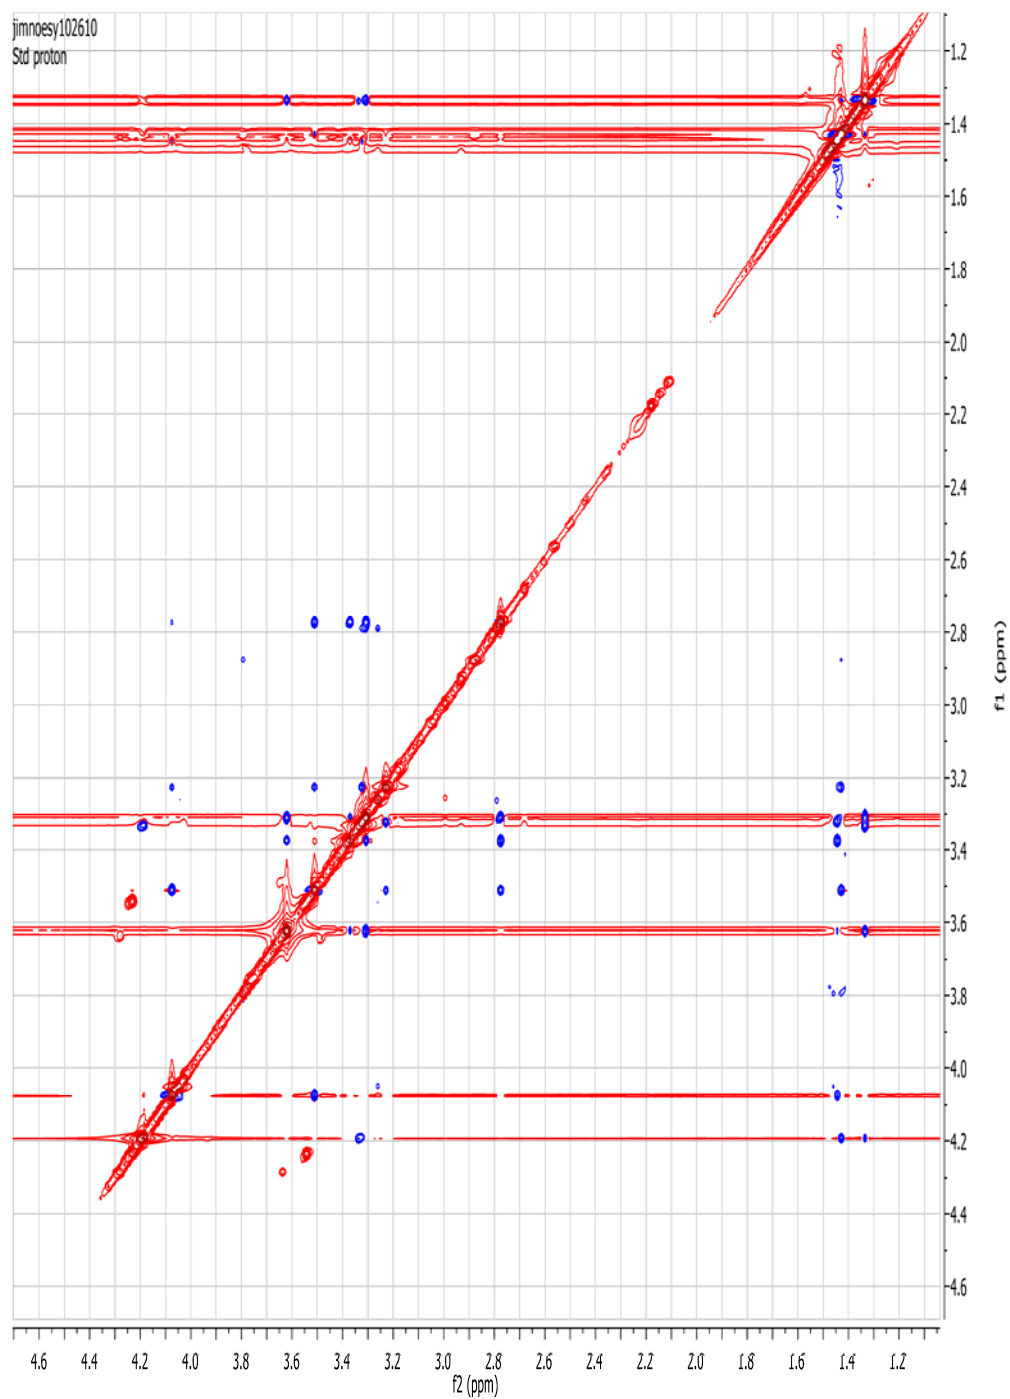

**Fig. S11** NOESY (Nuclear Overhauser Enhancement Spectroscopy) spectrum of **4** (benzene-*d*<sub>6</sub>, 26 °C), Part 1. Cross-peaks connect resonances of H atoms that are spatially close. Both f1 and f2 are <sup>1</sup>H NMR axes.

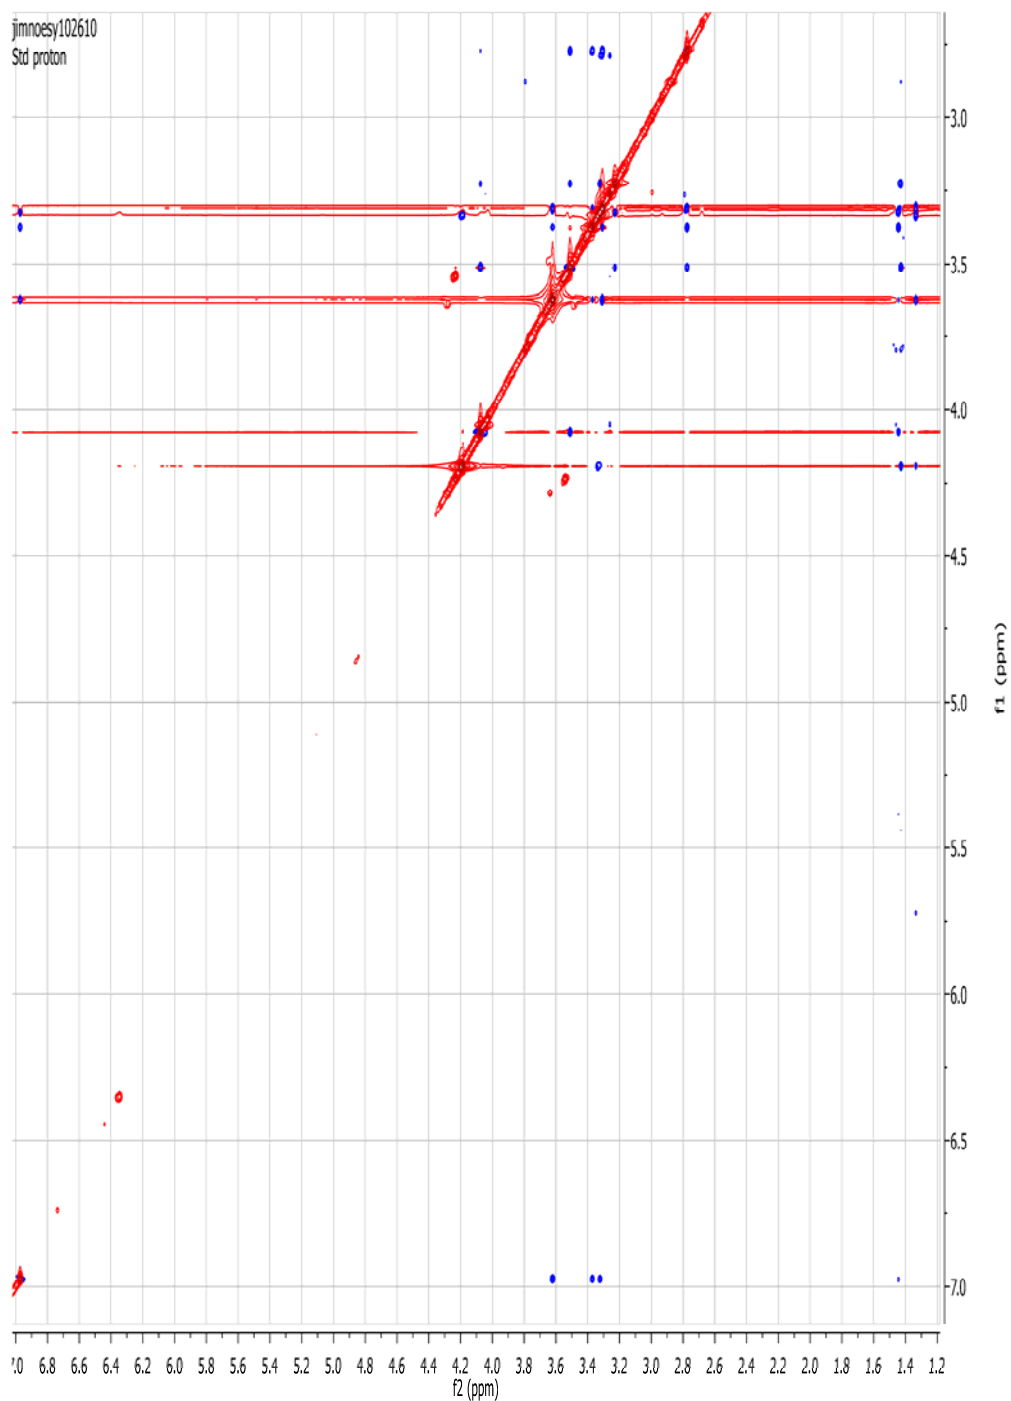

**Fig. S12** NOESY (Nuclear Overhauser Enhancement Spectroscopy) spectrum of **4** (benzene-*d*<sub>6</sub>, 26 °C), Part 2. Cross-peaks connect resonances of H atoms that are spatially close. Both f1 and f2 are <sup>1</sup>H NMR axes.

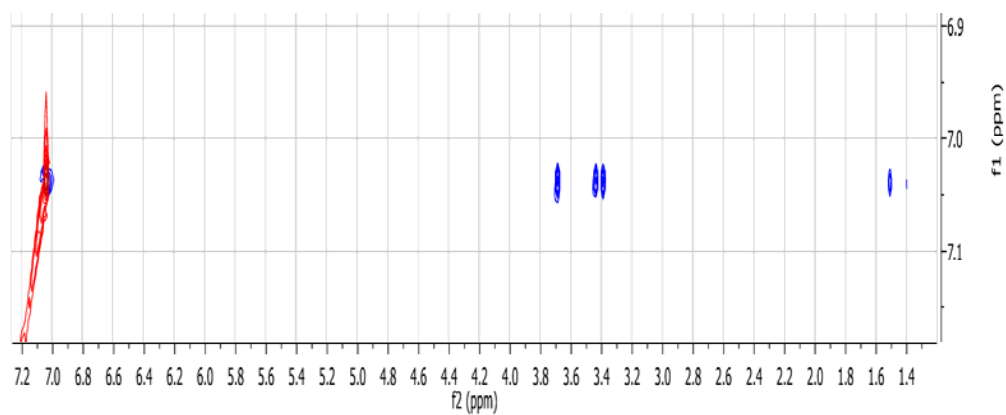

**Fig. S13** NOESY (Nuclear Overhauser Enhancement Spectroscopy) spectrum of **4** (benzene- $d_6$ , 26 °C), Part 3 near the hydride region on f1. Cross-peaks connect resonances of the hydride ligand with H atoms that are spatially close. Both f1 and f2 are  $^1\text{H}$  NMR axes.

**Table S1.** Crystal data and structure refinement for **2**.

|                                                     |                                                                |                     |
|-----------------------------------------------------|----------------------------------------------------------------|---------------------|
| Empirical formula                                   | C <sub>24</sub> H <sub>64</sub> N <sub>9</sub> Ta <sub>3</sub> |                     |
| Formula weight                                      | 1021.69                                                        |                     |
| Temperature                                         | 173(2) K                                                       |                     |
| Wavelength                                          | 0.71073 Å                                                      |                     |
| Crystal system                                      | Orthorhombic                                                   |                     |
| Space group                                         | Pna2(1)                                                        |                     |
| Unit cell dimensions                                | <i>a</i> = 21.270(11) Å                                        | $\alpha = 90^\circ$ |
|                                                     | <i>b</i> = 9.700(5) Å                                          | $\beta = 90^\circ$  |
|                                                     | <i>c</i> = 17.118(9) Å                                         | $\gamma = 90^\circ$ |
| Volume                                              | 3532(3) Å <sup>3</sup>                                         |                     |
| Z                                                   | 4                                                              |                     |
| Density (calculated)                                | 1.922 Mg/m <sup>3</sup>                                        |                     |
| Absorption coefficient                              | 9.298 mm <sup>-1</sup>                                         |                     |
| <i>F</i> (000)                                      | 1960                                                           |                     |
| Crystal size                                        | 0.20 x 0.20 x 0.05 mm <sup>3</sup>                             |                     |
| Theta range for data collection                     | 1.91 to 28.36°                                                 |                     |
| Index ranges                                        | -27 ≤ <i>h</i> ≤ 27, -12 ≤ <i>k</i> ≤ 12, -21 ≤ <i>l</i> ≤ 22  |                     |
| Reflections collected                               | 35048                                                          |                     |
| Independent reflections                             | 8156 [ <i>R</i> (int) = 0.0322]                                |                     |
| Completeness to theta = 28.36°                      | 95.2%                                                          |                     |
| Max. and min. transmission                          | 0.6535 and 0.2578                                              |                     |
| Refinement method                                   | Full-matrix least-squares on <i>F</i> <sup>2</sup>             |                     |
| Data / restraints / parameters                      | 8156 / 1 / 349                                                 |                     |
| Goodness-of-fit on <i>F</i> <sup>2</sup>            | 1.020                                                          |                     |
| Final <i>R</i> indices [ <i>I</i> > 2σ( <i>I</i> )] | <i>R</i> 1 = 0.0158, w <i>R</i> 2 = 0.0349                     |                     |
| <i>R</i> indices (all data)                         | <i>R</i> 1 = 0.0166, w <i>R</i> 2 = 0.0351                     |                     |
| Absolute structure parameter                        | -0.001(6)                                                      |                     |
| Largest diff. peak and hole                         | 0.897 and -1.394 e.Å <sup>-3</sup>                             |                     |

**Table S2.** Atomic coordinates ( $\times 10^4$ ) and equivalent isotropic displacement parameters ( $\text{\AA}^2 \times 10^3$ ) for **2**.  $U(\text{eq})$  is defined as one third of the trace of the orthogonalized  $U^{ij}$  tensor.

|       | x       | y       | z       | $U(\text{eq})$ |
|-------|---------|---------|---------|----------------|
| Ta(1) | 6419(1) | 5724(1) | 3557(1) | 14(1)          |
| Ta(2) | 6217(1) | 4971(1) | 5296(1) | 14(1)          |
| Ta(3) | 7528(1) | 4799(1) | 4628(1) | 18(1)          |
| N(1)  | 7411(1) | 5662(3) | 3622(2) | 20(1)          |
| N(2)  | 5734(1) | 5029(2) | 4326(2) | 16(1)          |
| N(3)  | 7122(1) | 6044(3) | 5569(2) | 22(1)          |
| N(4)  | 6272(1) | 4650(3) | 2576(2) | 19(1)          |
| N(5)  | 6206(1) | 7463(2) | 3329(2) | 19(1)          |
| N(6)  | 5758(1) | 6438(3) | 5904(2) | 22(1)          |
| N(7)  | 5948(1) | 3226(3) | 5822(2) | 21(1)          |
| N(8)  | 7733(1) | 2845(3) | 4372(2) | 25(1)          |
| N(9)  | 8401(2) | 5337(4) | 5004(2) | 32(1)          |
| C(1)  | 7851(2) | 6325(4) | 3046(2) | 27(1)          |
| C(2)  | 8493(2) | 5615(5) | 3046(3) | 44(1)          |
| C(3)  | 7583(2) | 6299(5) | 2228(2) | 38(1)          |
| C(4)  | 7937(2) | 7832(4) | 3297(3) | 43(1)          |
| C(5)  | 5070(2) | 4629(3) | 4141(2) | 21(1)          |
| C(6)  | 5078(2) | 3174(4) | 3795(2) | 31(1)          |
| C(7)  | 4784(2) | 5614(4) | 3546(3) | 30(1)          |
| C(8)  | 4653(2) | 4630(4) | 4874(2) | 32(1)          |
| C(9)  | 7358(2) | 5723(4) | 6367(2) | 29(1)          |
| C(10) | 7071(2) | 7552(3) | 5470(2) | 30(1)          |
| C(11) | 6466(2) | 3212(3) | 2591(2) | 31(1)          |
| C(12) | 6062(2) | 5052(4) | 1801(2) | 28(1)          |
| C(13) | 6031(2) | 8885(3) | 3173(2) | 24(1)          |
| C(14) | 5312(2) | 9064(4) | 3189(3) | 41(1)          |
| C(15) | 6277(3) | 9293(4) | 2366(3) | 46(1)          |
| C(16) | 6310(2) | 9817(4) | 3815(3) | 37(1)          |
| C(17) | 5824(2) | 6609(4) | 6749(2) | 36(1)          |
| C(18) | 5421(2) | 7614(4) | 5585(2) | 33(1)          |

|       |         |         |         |       |
|-------|---------|---------|---------|-------|
| C(19) | 5496(2) | 3176(4) | 6472(2) | 33(1) |
| C(20) | 6090(2) | 1828(4) | 5566(2) | 28(1) |
| C(21) | 7775(2) | 1796(4) | 4981(2) | 38(1) |
| C(22) | 7902(2) | 2256(4) | 3618(3) | 36(1) |
| C(23) | 8638(2) | 6677(5) | 5273(3) | 48(1) |
| C(24) | 8939(2) | 4371(5) | 4983(3) | 42(1) |

---

**Table S3.** Bond lengths (Å) and angles (deg) for **2**.

|             |            |              |          |
|-------------|------------|--------------|----------|
| Ta(1)-N(5)  | 1.789(3)   | C(1)-C(2)    | 1.530(5) |
| Ta(1)-N(4)  | 2.001(3)   | C(1)-C(4)    | 1.534(5) |
| Ta(1)-N(2)  | 2.076(3)   | C(2)-H(2A)   | 0.9800   |
| Ta(1)-N(1)  | 2.114(3)   | C(2)-H(2B)   | 0.9800   |
| Ta(1)-Ta(2) | 3.0950(15) | C(2)-H(2C)   | 0.9800   |
| Ta(1)-Ta(3) | 3.1190(11) | C(3)-H(3A)   | 0.9800   |
| Ta(2)-N(2)  | 1.953(3)   | C(3)-H(3B)   | 0.9800   |
| Ta(2)-N(7)  | 2.002(3)   | C(3)-H(3C)   | 0.9800   |
| Ta(2)-N(6)  | 2.016(3)   | C(4)-H(4A)   | 0.9800   |
| Ta(2)-N(3)  | 2.237(3)   | C(4)-H(4B)   | 0.9800   |
| Ta(2)-Ta(3) | 3.0173(13) | C(4)-H(4C)   | 0.9800   |
| Ta(2)-H(1)  | 1.95(4)    | C(5)-C(7)    | 1.524(5) |
| Ta(3)-N(1)  | 1.930(3)   | C(5)-C(6)    | 1.531(5) |
| Ta(3)-N(8)  | 1.994(3)   | C(5)-C(8)    | 1.535(5) |
| Ta(3)-N(9)  | 2.034(3)   | C(6)-H(6A)   | 0.9800   |
| Ta(3)-N(3)  | 2.191(3)   | C(6)-H(6B)   | 0.9800   |
| Ta(3)-H(1)  | 1.86(4)    | C(6)-H(6C)   | 0.9800   |
| N(1)-C(1)   | 1.505(4)   | C(7)-H(7A)   | 0.9800   |
| N(2)-C(5)   | 1.498(4)   | C(7)-H(7B)   | 0.9800   |
| N(3)-C(10)  | 1.476(4)   | C(7)-H(7C)   | 0.9800   |
| N(3)-C(9)   | 1.489(5)   | C(8)-H(8A)   | 0.9800   |
| N(4)-C(12)  | 1.453(5)   | C(8)-H(8B)   | 0.9800   |
| N(4)-C(11)  | 1.455(4)   | C(8)-H(8C)   | 0.9800   |
| N(5)-C(13)  | 1.454(4)   | C(9)-H(9A)   | 0.9800   |
| N(6)-C(18)  | 1.455(5)   | C(9)-H(9B)   | 0.9800   |
| N(6)-C(17)  | 1.462(5)   | C(9)-H(9C)   | 0.9800   |
| N(7)-C(20)  | 1.457(5)   | C(10)-H(10A) | 0.9800   |
| N(7)-C(19)  | 1.470(5)   | C(10)-H(10B) | 0.9800   |
| N(8)-C(22)  | 1.458(5)   | C(10)-H(10C) | 0.9800   |
| N(8)-C(21)  | 1.459(4)   | C(11)-H(11A) | 0.9800   |
| N(9)-C(23)  | 1.468(6)   | C(11)-H(11B) | 0.9800   |
| N(9)-C(24)  | 1.479(5)   | C(11)-H(11C) | 0.9800   |
| C(1)-C(3)   | 1.511(5)   | C(12)-H(12A) | 0.9800   |



|              |          |                   |            |
|--------------|----------|-------------------|------------|
| C(12)-H(12B) | 0.9800   | C(23)-H(23B)      | 0.9800     |
| C(12)-H(12C) | 0.9800   | C(24)-H(24D)      | 0.9800     |
| C(13)-C(15)  | 1.530(5) | C(24)-H(24A)      | 0.9800     |
| C(13)-C(14)  | 1.539(5) | C(24)-H(24B)      | 0.9800     |
| C(13)-C(16)  | 1.541(6) | N(5)-Ta(1)-N(4)   | 105.58(12) |
| C(14)-H(14A) | 0.9800   | N(5)-Ta(1)-N(2)   | 105.52(11) |
| C(14)-H(14B) | 0.9800   | N(4)-Ta(1)-N(2)   | 104.67(12) |
| C(14)-H(14C) | 0.9800   | N(5)-Ta(1)-N(1)   | 106.89(11) |
| C(15)-H(15A) | 0.9800   | N(4)-Ta(1)-N(1)   | 100.70(12) |
| C(15)-H(15B) | 0.9800   | N(2)-Ta(1)-N(1)   | 131.10(12) |
| C(15)-H(15C) | 0.9800   | N(5)-Ta(1)-Ta(2)  | 113.41(9)  |
| C(16)-H(16A) | 0.9800   | N(4)-Ta(1)-Ta(2)  | 131.50(9)  |
| C(16)-H(16B) | 0.9800   | N(2)-Ta(1)-Ta(2)  | 38.38(8)   |
| C(16)-H(16C) | 0.9800   | N(1)-Ta(1)-Ta(2)  | 94.62(9)   |
| C(17)-H(17A) | 0.9800   | N(5)-Ta(1)-Ta(3)  | 126.18(9)  |
| C(17)-H(17B) | 0.9800   | N(4)-Ta(1)-Ta(3)  | 117.49(8)  |
| C(17)-H(17C) | 0.9800   | N(2)-Ta(1)-Ta(3)  | 93.68(9)   |
| C(18)-H(18A) | 0.9800   | N(1)-Ta(1)-Ta(3)  | 37.42(9)   |
| C(18)-H(18B) | 0.9800   | Ta(2)-Ta(1)-Ta(3) | 58.10(2)   |
| C(18)-H(18C) | 0.9800   | N(2)-Ta(2)-N(7)   | 104.85(11) |
| C(19)-H(19A) | 0.9800   | N(2)-Ta(2)-N(6)   | 99.46(12)  |
| C(19)-H(19B) | 0.9800   | N(7)-Ta(2)-N(6)   | 103.04(12) |
| C(19)-H(19C) | 0.9800   | N(2)-Ta(2)-N(3)   | 128.08(11) |
| C(20)-H(20A) | 0.9800   | N(7)-Ta(2)-N(3)   | 123.08(11) |
| C(20)-H(20B) | 0.9800   | N(6)-Ta(2)-N(3)   | 88.84(12)  |
| C(20)-H(20C) | 0.9800   | N(2)-Ta(2)-Ta(3)  | 99.52(9)   |
| C(21)-H(21A) | 0.9800   | N(7)-Ta(2)-Ta(3)  | 112.87(8)  |
| C(21)-H(21B) | 0.9800   | N(6)-Ta(2)-Ta(3)  | 133.00(8)  |
| C(21)-H(21C) | 0.9800   | N(3)-Ta(2)-Ta(3)  | 46.40(8)   |
| C(22)-H(22A) | 0.9800   | N(2)-Ta(2)-Ta(1)  | 41.30(8)   |
| C(22)-H(22B) | 0.9800   | N(7)-Ta(2)-Ta(1)  | 132.26(8)  |
| C(22)-H(22D) | 0.9800   | N(6)-Ta(2)-Ta(1)  | 113.42(9)  |
| C(23)-H(23A) | 0.9800   | N(3)-Ta(2)-Ta(1)  | 88.39(8)   |
| C(23)-H(23D) | 0.9800   | Ta(3)-Ta(2)-Ta(1) | 61.349(10) |

|                   |            |                  |           |
|-------------------|------------|------------------|-----------|
| N(2)-Ta(2)-H(1)   | 109.2(11)  | C(10)-N(3)-Ta(3) | 119.4(2)  |
| N(7)-Ta(2)-H(1)   | 76.4(11)   | C(9)-N(3)-Ta(3)  | 115.3(2)  |
| N(6)-Ta(2)-H(1)   | 150.6(11)  | C(10)-N(3)-Ta(2) | 111.9(2)  |
| N(3)-Ta(2)-H(1)   | 68.4(11)   | C(9)-N(3)-Ta(2)  | 112.6(2)  |
| Ta(3)-Ta(2)-H(1)  | 36.4(11)   | Ta(3)-N(3)-Ta(2) | 85.90(10) |
| Ta(1)-Ta(2)-H(1)  | 85.4(11)   | C(12)-N(4)-C(11) | 111.1(3)  |
| N(1)-Ta(3)-N(8)   | 104.20(13) | C(12)-N(4)-Ta(1) | 132.4(2)  |
| N(1)-Ta(3)-N(9)   | 106.78(13) | C(11)-N(4)-Ta(1) | 116.1(2)  |
| N(8)-Ta(3)-N(9)   | 96.48(13)  | C(13)-N(5)-Ta(1) | 178.0(3)  |
| N(1)-Ta(3)-N(3)   | 111.47(12) | C(18)-N(6)-C(17) | 109.3(3)  |
| N(8)-Ta(3)-N(3)   | 140.50(11) | C(18)-N(6)-Ta(2) | 126.7(2)  |
| N(9)-Ta(3)-N(3)   | 89.17(13)  | C(17)-N(6)-Ta(2) | 123.0(2)  |
| N(1)-Ta(3)-Ta(2)  | 101.25(8)  | C(20)-N(7)-C(19) | 109.4(3)  |
| N(8)-Ta(3)-Ta(2)  | 109.76(8)  | C(20)-N(7)-Ta(2) | 126.3(2)  |
| N(9)-Ta(3)-Ta(2)  | 135.19(10) | C(19)-N(7)-Ta(2) | 123.7(2)  |
| N(3)-Ta(3)-Ta(2)  | 47.70(7)   | C(22)-N(8)-C(21) | 110.1(3)  |
| N(1)-Ta(3)-Ta(1)  | 41.73(8)   | C(22)-N(8)-Ta(3) | 128.4(2)  |
| N(8)-Ta(3)-Ta(1)  | 108.10(9)  | C(21)-N(8)-Ta(3) | 121.4(2)  |
| N(9)-Ta(3)-Ta(1)  | 143.41(10) | C(23)-N(9)-C(24) | 107.7(3)  |
| N(3)-Ta(3)-Ta(1)  | 88.61(8)   | C(23)-N(9)-Ta(3) | 129.7(3)  |
| Ta(2)-Ta(3)-Ta(1) | 60.55(3)   | C(24)-N(9)-Ta(3) | 122.4(3)  |
| N(1)-Ta(3)-H(1)   | 126.0(11)  | N(1)-C(1)-C(3)   | 111.5(3)  |
| N(8)-Ta(3)-H(1)   | 74.6(11)   | N(1)-C(1)-C(2)   | 111.3(3)  |
| N(9)-Ta(3)-H(1)   | 127.2(11)  | C(3)-C(1)-C(2)   | 109.2(3)  |
| N(3)-Ta(3)-H(1)   | 71.0(11)   | N(1)-C(1)-C(4)   | 107.3(3)  |
| Ta(2)-Ta(3)-H(1)  | 38.6(11)   | C(3)-C(1)-C(4)   | 108.7(3)  |
| Ta(1)-Ta(3)-H(1)  | 86.2(11)   | C(2)-C(1)-C(4)   | 108.8(3)  |
| C(1)-N(1)-Ta(3)   | 133.6(2)   | C(1)-C(2)-H(2A)  | 109.5     |
| C(1)-N(1)-Ta(1)   | 125.0(2)   | C(1)-C(2)-H(2B)  | 109.5     |
| Ta(3)-N(1)-Ta(1)  | 100.85(13) | H(2A)-C(2)-H(2B) | 109.5     |
| C(5)-N(2)-Ta(2)   | 131.9(2)   | C(1)-C(2)-H(2C)  | 109.5     |
| C(5)-N(2)-Ta(1)   | 127.7(2)   | H(2A)-C(2)-H(2C) | 109.5     |
| Ta(2)-N(2)-Ta(1)  | 100.32(12) | H(2B)-C(2)-H(2C) | 109.5     |
| C(10)-N(3)-C(9)   | 109.7(3)   | C(1)-C(3)-H(3A)  | 109.5     |

|                  |          |                     |          |
|------------------|----------|---------------------|----------|
| C(1)-C(3)-H(3B)  | 109.5    | H(8B)-C(8)-H(8C)    | 109.5    |
| H(3A)-C(3)-H(3B) | 109.5    | N(3)-C(9)-H(9A)     | 109.5    |
| C(1)-C(3)-H(3C)  | 109.5    | N(3)-C(9)-H(9B)     | 109.5    |
| H(3A)-C(3)-H(3C) | 109.5    | H(9A)-C(9)-H(9B)    | 109.5    |
| H(3B)-C(3)-H(3C) | 109.5    | N(3)-C(9)-H(9C)     | 109.5    |
| C(1)-C(4)-H(4A)  | 109.5    | H(9A)-C(9)-H(9C)    | 109.5    |
| C(1)-C(4)-H(4B)  | 109.5    | H(9B)-C(9)-H(9C)    | 109.5    |
| H(4A)-C(4)-H(4B) | 109.5    | N(3)-C(10)-H(10A)   | 109.5    |
| C(1)-C(4)-H(4C)  | 109.5    | N(3)-C(10)-H(10B)   | 109.5    |
| H(4A)-C(4)-H(4C) | 109.5    | H(10A)-C(10)-H(10B) | 109.5    |
| H(4B)-C(4)-H(4C) | 109.5    | N(3)-C(10)-H(10C)   | 109.5    |
| N(2)-C(5)-C(7)   | 110.8(3) | H(10A)-C(10)-H(10C) | 109.5    |
| N(2)-C(5)-C(6)   | 108.1(3) | H(10B)-C(10)-H(10C) | 109.5    |
| C(7)-C(5)-C(6)   | 108.9(3) | N(4)-C(11)-H(11A)   | 109.5    |
| N(2)-C(5)-C(8)   | 111.8(3) | N(4)-C(11)-H(11B)   | 109.5    |
| C(7)-C(5)-C(8)   | 108.4(3) | H(11A)-C(11)-H(11B) | 109.5    |
| C(6)-C(5)-C(8)   | 108.9(3) | N(4)-C(11)-H(11C)   | 109.5    |
| C(5)-C(6)-H(6A)  | 109.5    | H(11A)-C(11)-H(11C) | 109.5    |
| C(5)-C(6)-H(6B)  | 109.5    | H(11B)-C(11)-H(11C) | 109.5    |
| H(6A)-C(6)-H(6B) | 109.5    | N(4)-C(12)-H(12A)   | 109.5    |
| C(5)-C(6)-H(6C)  | 109.5    | N(4)-C(12)-H(12B)   | 109.5    |
| H(6A)-C(6)-H(6C) | 109.5    | H(12A)-C(12)-H(12B) | 109.5    |
| H(6B)-C(6)-H(6C) | 109.5    | N(4)-C(12)-H(12C)   | 109.5    |
| C(5)-C(7)-H(7A)  | 109.5    | H(12A)-C(12)-H(12C) | 109.5    |
| C(5)-C(7)-H(7B)  | 109.5    | H(12B)-C(12)-H(12C) | 109.5    |
| H(7A)-C(7)-H(7B) | 109.5    | N(5)-C(13)-C(15)    | 108.9(3) |
| C(5)-C(7)-H(7C)  | 109.5    | N(5)-C(13)-C(14)    | 111.0(3) |
| H(7A)-C(7)-H(7C) | 109.5    | C(15)-C(13)-C(14)   | 109.0(4) |
| H(7B)-C(7)-H(7C) | 109.5    | N(5)-C(13)-C(16)    | 109.1(3) |
| C(5)-C(8)-H(8A)  | 109.5    | C(15)-C(13)-C(16)   | 111.2(3) |
| C(5)-C(8)-H(8B)  | 109.5    | C(14)-C(13)-C(16)   | 107.7(3) |
| H(8A)-C(8)-H(8B) | 109.5    | C(13)-C(14)-H(14A)  | 109.5    |
| C(5)-C(8)-H(8C)  | 109.5    | C(13)-C(14)-H(14B)  | 109.5    |
| H(8A)-C(8)-H(8C) | 109.5    | H(14A)-C(14)-H(14B) | 109.5    |

|                     |       |                     |       |
|---------------------|-------|---------------------|-------|
| C(13)-C(14)-H(14C)  | 109.5 | H(19B)-C(19)-H(19C) | 109.5 |
| H(14A)-C(14)-H(14C) | 109.5 | N(7)-C(20)-H(20A)   | 109.5 |
| H(14B)-C(14)-H(14C) | 109.5 | N(7)-C(20)-H(20B)   | 109.5 |
| C(13)-C(15)-H(15A)  | 109.5 | H(20A)-C(20)-H(20B) | 109.5 |
| C(13)-C(15)-H(15B)  | 109.5 | N(7)-C(20)-H(20C)   | 109.5 |
| H(15A)-C(15)-H(15B) | 109.5 | H(20A)-C(20)-H(20C) | 109.5 |
| C(13)-C(15)-H(15C)  | 109.5 | H(20B)-C(20)-H(20C) | 109.5 |
| H(15A)-C(15)-H(15C) | 109.5 | N(8)-C(21)-H(21A)   | 109.5 |
| H(15B)-C(15)-H(15C) | 109.5 | N(8)-C(21)-H(21B)   | 109.5 |
| C(13)-C(16)-H(16A)  | 109.5 | H(21A)-C(21)-H(21B) | 109.5 |
| C(13)-C(16)-H(16B)  | 109.5 | N(8)-C(21)-H(21C)   | 109.5 |
| H(16A)-C(16)-H(16B) | 109.5 | H(21A)-C(21)-H(21C) | 109.5 |
| C(13)-C(16)-H(16C)  | 109.5 | H(21B)-C(21)-H(21C) | 109.5 |
| H(16A)-C(16)-H(16C) | 109.5 | N(8)-C(22)-H(22A)   | 109.5 |
| H(16B)-C(16)-H(16C) | 109.5 | N(8)-C(22)-H(22B)   | 109.5 |
| N(6)-C(17)-H(17A)   | 109.5 | H(22A)-C(22)-H(22B) | 109.5 |
| N(6)-C(17)-H(17B)   | 109.5 | N(8)-C(22)-H(22D)   | 109.5 |
| H(17A)-C(17)-H(17B) | 109.5 | H(22A)-C(22)-H(22D) | 109.5 |
| N(6)-C(17)-H(17C)   | 109.5 | H(22B)-C(22)-H(22D) | 109.5 |
| H(17A)-C(17)-H(17C) | 109.5 | N(9)-C(23)-H(23A)   | 109.5 |
| H(17B)-C(17)-H(17C) | 109.5 | N(9)-C(23)-H(23D)   | 109.5 |
| N(6)-C(18)-H(18A)   | 109.5 | H(23A)-C(23)-H(23D) | 109.5 |
| N(6)-C(18)-H(18B)   | 109.5 | N(9)-C(23)-H(23B)   | 109.5 |
| H(18A)-C(18)-H(18B) | 109.5 | H(23A)-C(23)-H(23B) | 109.5 |
| N(6)-C(18)-H(18C)   | 109.5 | H(23D)-C(23)-H(23B) | 109.5 |
| H(18A)-C(18)-H(18C) | 109.5 | N(9)-C(24)-H(24D)   | 109.5 |
| H(18B)-C(18)-H(18C) | 109.5 | N(9)-C(24)-H(24A)   | 109.5 |
| N(7)-C(19)-H(19A)   | 109.5 | H(24D)-C(24)-H(24A) | 109.5 |
| N(7)-C(19)-H(19B)   | 109.5 | N(9)-C(24)-H(24B)   | 109.5 |
| H(19A)-C(19)-H(19B) | 109.5 | H(24D)-C(24)-H(24B) | 109.5 |
| N(7)-C(19)-H(19C)   | 109.5 | H(24A)-C(24)-H(24B) | 109.5 |
| H(19A)-C(19)-H(19C) | 109.5 |                     |       |

---

Symmetry transformations used to generate equivalent atoms:

**Table S4.** Anisotropic displacement parameters ( $\text{Å}^2 \times 10^3$ ) for **2**. The anisotropic displacement factor exponent takes the form:  $-2\pi^2[h^2a^{*2}U^{11} + \dots + 2hka^*b^*U^{12}]$ .

|       | $U^{11}$ | $U^{22}$ | $U^{33}$ | $U^{23}$ | $U^{13}$ | $U^{12}$ |
|-------|----------|----------|----------|----------|----------|----------|
| Ta(1) | 13(1)    | 16(1)    | 12(1)    | 1(1)     | 1(1)     | -1(1)    |
| Ta(2) | 12(1)    | 19(1)    | 12(1)    | 0(1)     | 0(1)     | 0(1)     |
| Ta(3) | 11(1)    | 25(1)    | 16(1)    | 2(1)     | 0(1)     | 0(1)     |
| N(1)  | 16(1)    | 26(1)    | 19(2)    | 4(1)     | 4(1)     | -2(1)    |
| N(2)  | 10(1)    | 22(1)    | 16(2)    | 1(1)     | 0(1)     | -1(1)    |
| N(3)  | 20(2)    | 26(1)    | 20(2)    | 0(1)     | -6(1)    | -3(1)    |
| N(4)  | 23(2)    | 19(1)    | 16(2)    | 0(1)     | 0(1)     | 3(1)     |
| N(5)  | 22(1)    | 15(1)    | 20(2)    | 1(1)     | 2(1)     | 0(1)     |
| N(6)  | 19(1)    | 28(1)    | 19(2)    | -4(1)    | 2(1)     | 2(1)     |
| N(7)  | 17(1)    | 26(1)    | 19(2)    | 1(1)     | 2(1)     | -2(1)    |
| N(8)  | 20(2)    | 28(1)    | 26(2)    | 3(1)     | 6(1)     | 5(1)     |
| N(9)  | 14(2)    | 50(2)    | 32(2)    | -3(2)    | -3(1)    | -3(1)    |
| C(1)  | 17(2)    | 37(2)    | 28(2)    | 11(2)    | 5(2)     | -1(2)    |
| C(2)  | 19(2)    | 72(3)    | 39(3)    | 22(2)    | 12(2)    | 4(2)     |
| C(3)  | 28(2)    | 61(3)    | 24(2)    | 14(2)    | 12(2)    | -1(2)    |
| C(4)  | 34(2)    | 42(2)    | 54(3)    | 9(2)     | 7(2)     | -16(2)   |
| C(5)  | 11(2)    | 26(2)    | 26(2)    | 2(1)     | -4(1)    | -3(1)    |
| C(6)  | 26(2)    | 31(2)    | 36(2)    | -4(2)    | -4(2)    | -6(2)    |
| C(7)  | 18(2)    | 38(2)    | 33(2)    | 11(2)    | -7(2)    | -3(1)    |
| C(8)  | 19(2)    | 50(2)    | 27(2)    | -1(2)    | 0(2)     | -7(2)    |
| C(9)  | 27(2)    | 42(2)    | 19(2)    | 1(2)     | -9(2)    | -6(2)    |
| C(10) | 25(2)    | 28(2)    | 36(2)    | -3(2)    | -1(2)    | -5(2)    |
| C(11) | 40(2)    | 20(2)    | 32(2)    | -7(2)    | -4(2)    | 4(2)     |
| C(12) | 35(2)    | 31(2)    | 17(2)    | -1(2)    | -5(2)    | 2(2)     |
| C(13) | 28(2)    | 19(2)    | 25(2)    | 4(1)     | 3(2)     | 3(1)     |
| C(14) | 32(2)    | 24(2)    | 66(3)    | 5(2)     | -8(2)    | 8(2)     |
| C(15) | 81(4)    | 25(2)    | 31(3)    | 12(2)    | 19(2)    | 7(2)     |
| C(16) | 45(3)    | 21(2)    | 46(3)    | -1(2)    | -8(2)    | -4(2)    |
| C(17) | 34(2)    | 51(2)    | 23(2)    | -9(2)    | 2(2)     | 2(2)     |
| C(18) | 28(2)    | 30(2)    | 41(2)    | -5(2)    | 0(2)     | 8(2)     |

|       |       |       |       |        |       |        |
|-------|-------|-------|-------|--------|-------|--------|
| C(19) | 30(2) | 40(2) | 28(2) | 11(2)  | 10(2) | 4(2)   |
| C(20) | 26(2) | 26(2) | 32(2) | 1(2)   | -1(2) | -4(2)  |
| C(21) | 29(2) | 43(2) | 41(2) | 16(2)  | 7(2)  | 16(2)  |
| C(22) | 36(2) | 36(2) | 35(2) | 0(2)   | 10(2) | 9(2)   |
| C(23) | 21(2) | 65(3) | 60(3) | -13(3) | -2(2) | -19(2) |
| C(24) | 16(2) | 68(3) | 41(3) | 9(2)   | -1(2) | 5(2)   |

---

**Table S5.** Hydrogen coordinates ( $\times 10^4$ ) and isotropic displacement parameters ( $\text{\AA}^2 \times 10^3$ ) for **2**.

|        | x        | y        | z        | $U(\text{eq})$ |
|--------|----------|----------|----------|----------------|
| H(1)   | 6936(18) | 3750(40) | 5160(20) | 26             |
| H(2A)  | 8443     | 4649     | 2892     | 65             |
| H(2B)  | 8675     | 5660     | 3572     | 65             |
| H(2C)  | 8773     | 6082     | 2676     | 65             |
| H(3A)  | 7496     | 5344     | 2076     | 57             |
| H(3B)  | 7888     | 6702     | 1864     | 57             |
| H(3C)  | 7193     | 6834     | 2214     | 57             |
| H(4A)  | 7525     | 8277     | 3339     | 65             |
| H(4B)  | 8192     | 8318     | 2908     | 65             |
| H(4C)  | 8149     | 7862     | 3805     | 65             |
| H(6A)  | 5319     | 3177     | 3307     | 46             |
| H(6B)  | 4646     | 2875     | 3689     | 46             |
| H(6C)  | 5275     | 2538     | 4167     | 46             |
| H(7A)  | 5029     | 5581     | 3061     | 45             |
| H(7B)  | 4790     | 6554     | 3755     | 45             |
| H(7C)  | 4349     | 5341     | 3438     | 45             |
| H(8A)  | 4678     | 5532     | 5129     | 48             |
| H(8B)  | 4798     | 3914     | 5235     | 48             |
| H(8C)  | 4217     | 4443     | 4724     | 48             |
| H(9A)  | 7801     | 5990     | 6407     | 44             |
| H(9B)  | 7317     | 4732     | 6466     | 44             |
| H(9C)  | 7112     | 6236     | 6754     | 44             |
| H(10A) | 7488     | 7970     | 5516     | 44             |
| H(10B) | 6794     | 7930     | 5874     | 44             |
| H(10C) | 6896     | 7758     | 4953     | 44             |
| H(11A) | 6108     | 2624     | 2451     | 46             |
| H(11B) | 6613     | 2973     | 3116     | 46             |
| H(11C) | 6807     | 3070     | 2215     | 46             |
| H(12A) | 6399     | 4881     | 1423     | 42             |
| H(12B) | 5955     | 6035     | 1800     | 42             |

|        |      |       |      |    |
|--------|------|-------|------|----|
| H(12C) | 5691 | 4511  | 1657 | 42 |
| H(14A) | 5122 | 8498  | 2778 | 61 |
| H(14B) | 5206 | 10035 | 3100 | 61 |
| H(14C) | 5150 | 8773  | 3699 | 61 |
| H(15A) | 6071 | 8727  | 1966 | 69 |
| H(15B) | 6732 | 9144  | 2345 | 69 |
| H(15C) | 6185 | 10268 | 2269 | 69 |
| H(16A) | 6770 | 9771  | 3795 | 56 |
| H(16B) | 6164 | 9501  | 4328 | 56 |
| H(16C) | 6174 | 10770 | 3730 | 56 |
| H(17A) | 5406 | 6687  | 6987 | 54 |
| H(17B) | 6066 | 7446  | 6859 | 54 |
| H(17C) | 6043 | 5808  | 6968 | 54 |
| H(18A) | 4994 | 7636  | 5800 | 50 |
| H(18B) | 5400 | 7531  | 5015 | 50 |
| H(18C) | 5641 | 8466  | 5724 | 50 |
| H(19A) | 5130 | 2625  | 6318 | 49 |
| H(19B) | 5360 | 4114  | 6602 | 49 |
| H(19C) | 5696 | 2757  | 6929 | 49 |
| H(20A) | 6270 | 1305  | 6002 | 42 |
| H(20B) | 6392 | 1860  | 5135 | 42 |
| H(20C) | 5702 | 1378  | 5390 | 42 |
| H(21A) | 8198 | 1392  | 4979 | 57 |
| H(21B) | 7464 | 1073  | 4881 | 57 |
| H(21C) | 7693 | 2218  | 5491 | 57 |
| H(22A) | 7653 | 1422  | 3525 | 54 |
| H(22B) | 8350 | 2020  | 3616 | 54 |
| H(22D) | 7817 | 2929  | 3204 | 54 |
| H(23A) | 8783 | 6596  | 5814 | 73 |
| H(23D) | 8300 | 7362  | 5244 | 73 |
| H(23B) | 8988 | 6969  | 4939 | 73 |
| H(24D) | 9112 | 4269  | 5511 | 63 |
| H(24A) | 9264 | 4733  | 4633 | 63 |
| H(24B) | 8796 | 3471  | 4793 | 63 |

---



**Table S6.** Crystal data and structure refinement for **4**.

|                                      |                                                              |                     |
|--------------------------------------|--------------------------------------------------------------|---------------------|
| Empirical formula                    | $C_{24}H_{64}N_9OTa_3$                                       |                     |
| Formula weight                       | 1037.69                                                      |                     |
| Temperature                          | 173(2) K                                                     |                     |
| Wavelength                           | 0.71073 Å                                                    |                     |
| Crystal system                       | Orthorhombic                                                 |                     |
| Space group                          | $P2(1)2(1)2(1)$                                              |                     |
| Unit cell dimensions                 | $a = 9.289(4)$ Å                                             | $\alpha = 90^\circ$ |
|                                      | $b = 17.389(7)$ Å                                            | $\beta = 90^\circ$  |
|                                      | $c = 23.143(9)$ Å                                            | $\gamma = 90^\circ$ |
| Volume                               | $3738(2)$ Å <sup>3</sup>                                     |                     |
| Z                                    | 4                                                            |                     |
| Density (calculated)                 | 1.844 Mg/m <sup>3</sup>                                      |                     |
| Absorption coefficient               | 8.787 mm <sup>-1</sup>                                       |                     |
| $F(000)$                             | 1992                                                         |                     |
| Crystal size                         | 0.40 x 0.20 x 0.20 mm <sup>3</sup>                           |                     |
| Theta range for data collection      | 1.46 to 27.50°                                               |                     |
| Index ranges                         | $-11 \leq h \leq 12, -22 \leq k \leq 22, -29 \leq l \leq 30$ |                     |
| Reflections collected                | 38925                                                        |                     |
| Independent reflections              | 8559 [ $R(\text{int}) = 0.0675$ ]                            |                     |
| Completeness to theta = 27.50°       | 100.0%                                                       |                     |
| Max. and min. transmission           | 0.2724 and 0.1269                                            |                     |
| Refinement method                    | Full-matrix least-squares on $F^2$                           |                     |
| Data / restraints / parameters       | 8559 / 42 / 345                                              |                     |
| Goodness-of-fit on $F^2$             | 1.071                                                        |                     |
| Final R indices [ $I > 2\sigma(I)$ ] | $R1 = 0.0394, wR2 = 0.1076$                                  |                     |
| R indices (all data)                 | $R1 = 0.0404, wR2 = 0.1082$                                  |                     |
| Absolute structure parameter         | 0.20(2)                                                      |                     |
| Extinction coefficient               | 0.00023(6)                                                   |                     |
| Largest diff. peak and hole          | 6.897 and -0.829 e.Å <sup>-3</sup>                           |                     |

**Table S7.** Atomic coordinates ( $\times 10^4$ ) and equivalent isotropic displacement parameters ( $\text{\AA}^2 \times 10^3$ ) for **4**.  $U(\text{eq})$  is defined as one third of the trace of the orthogonalized  $U^{ij}$  tensor.

|        | x        | y         | z        | U(eq) |
|--------|----------|-----------|----------|-------|
| Ta(1)  | 5909(1)  | 9523(1)   | 309(1)   | 28(1) |
| Ta(2)  | 6977(1)  | 10878(1)  | 1027(1)  | 30(1) |
| Ta(3)  | 6084(1)  | 9436(1)   | 1796(1)  | 28(1) |
| O(1)   | 7240(6)  | 9744(3)   | 1062(3)  | 30(1) |
| N(1)   | 7243(9)  | 10545(5)  | 87(3)    | 40(2) |
| N(2)   | 4829(8)  | 8942(5)   | 1049(3)  | 34(2) |
| N(3)   | 6924(9)  | 10586(4)  | 1959(3)  | 36(2) |
| N(4)   | 4521(8)  | 9541(5)   | -223(3)  | 36(2) |
| N(5)   | 7128(9)  | 8677(5)   | 14(3)    | 38(2) |
| N(6)   | 5930(11) | 11874(5)  | 912(4)   | 45(2) |
| N(7)   | 9026(10) | 11245(5)  | 1039(4)  | 50(2) |
| N(8)   | 4443(11) | 9417(5)   | 2361(4)  | 50(2) |
| N(9)   | 7228(10) | 8692(4)   | 2072(3)  | 35(2) |
| C(1)   | 8697(13) | 10301(8)  | -93(5)   | 56(3) |
| C(2)   | 6617(16) | 11100(8)  | -324(5)  | 60(3) |
| C(3)   | 3260(10) | 9102(10)  | 1076(5)  | 66(4) |
| C(4)   | 4970(14) | 8112(6)   | 1026(5)  | 53(3) |
| C(5)   | 7044(14) | 11081(6)  | 2497(5)  | 47(2) |
| C(6)   | 8394(17) | 10819(8)  | 2808(6)  | 72(4) |
| C(7)   | 5731(19) | 10994(8)  | 2881(5)  | 67(4) |
| C(8)   | 7249(16) | 11910(7)  | 2325(6)  | 60(3) |
| C(9)   | 3305(10) | 9680(6)   | -605(4)  | 51(3) |
| C(10)  | 2320(20) | 10264(10) | -313(9)  | 54(4) |
| C(11)  | 2430(30) | 8986(10)  | -769(11) | 78(6) |
| C(12)  | 3860(20) | 10061(13) | -1160(7) | 69(5) |
| C(10B) | 2550(30) | 10440(10) | -536(12) | 54(4) |
| C(11B) | 2200(30) | 9039(13)  | -496(14) | 78(6) |
| C(12B) | 3790(30) | 9596(17)  | -1229(7) | 69(5) |
| C(13)  | 8461(12) | 8404(7)   | 261(6)   | 56(3) |

|        |           |           |          |       |
|--------|-----------|-----------|----------|-------|
| C(14)  | 6838(15)  | 8201(7)   | -505(5)  | 56(3) |
| C(15)  | 4300(17)  | 11936(9)  | 850(7)   | 75(4) |
| C(16)  | 6619(18)  | 12645(6)  | 846(6)   | 62(4) |
| C(17)  | 9868(19)  | 11732(10) | 659(7)   | 84(5) |
| C(18)  | 10101(15) | 10861(9)  | 1458(6)  | 74(4) |
| C(19)  | 3154(15)  | 9871(8)   | 2339(6)  | 60(3) |
| C(20)  | 4322(17)  | 8881(8)   | 2868(5)  | 64(4) |
| C(21)  | 8322(12)  | 8178(5)   | 2287(4)  | 52(3) |
| C(22)  | 7650(20)  | 7381(8)   | 2355(8)  | 62(5) |
| C(23)  | 8910(20)  | 8429(12)  | 2869(6)  | 77(6) |
| C(24)  | 9580(20)  | 8104(13)  | 1865(8)  | 83(6) |
| C(22B) | 8190(50)  | 7362(11)  | 2071(15) | 62(5) |
| C(23B) | 8270(50)  | 8170(20)  | 2947(6)  | 77(6) |
| C(24B) | 9760(30)  | 8510(20)  | 2100(18) | 83(6) |

---

**Table S8.** Bond lengths (Å) and angles (deg) for **4**.

|            |           |                 |           |
|------------|-----------|-----------------|-----------|
| Ta(1)-N(4) | 1.784(7)  | C(5)-C(6)       | 1.516(18) |
| Ta(1)-N(5) | 1.978(8)  | C(5)-C(7)       | 1.516(19) |
| Ta(1)-O(1) | 2.170(6)  | C(9)-C(10B)     | 1.504(9)  |
| Ta(1)-N(1) | 2.227(9)  | C(9)-C(11)      | 1.504(9)  |
| Ta(1)-N(2) | 2.227(8)  | C(9)-C(12B)     | 1.520(9)  |
| Ta(2)-H(1) | 1.89(8)   | C(9)-C(10)      | 1.526(9)  |
| Ta(2)-O(1) | 1.989(6)  | C(9)-C(12)      | 1.532(9)  |
| Ta(2)-N(6) | 2.003(8)  | C(9)-C(11B)     | 1.538(10) |
| Ta(2)-N(7) | 2.008(9)  | C(21)-C(22B)    | 1.510(10) |
| Ta(2)-N(3) | 2.217(8)  | C(21)-C(23)     | 1.518(9)  |
| Ta(2)-N(1) | 2.265(8)  | C(21)-C(24B)    | 1.516(10) |
| Ta(3)-N(9) | 1.793(8)  | C(21)-C(24)     | 1.527(9)  |
| Ta(3)-N(8) | 2.008(10) | C(21)-C(22)     | 1.528(9)  |
| Ta(3)-O(1) | 2.080(6)  | C(21)-C(23B)    | 1.527(10) |
| Ta(3)-N(3) | 2.180(7)  | N(4)-Ta(1)-N(5) | 100.8(3)  |
| Ta(3)-N(2) | 2.256(7)  | N(4)-Ta(1)-O(1) | 164.4(3)  |
| N(1)-C(1)  | 1.475(14) | N(5)-Ta(1)-O(1) | 94.7(3)   |
| N(1)-C(2)  | 1.473(14) | N(4)-Ta(1)-N(1) | 103.2(4)  |
| N(2)-C(4)  | 1.449(14) | N(5)-Ta(1)-N(1) | 101.2(3)  |
| N(2)-C(3)  | 1.485(13) | O(1)-Ta(1)-N(1) | 74.2(3)   |
| N(3)-C(5)  | 1.517(12) | N(4)-Ta(1)-N(2) | 102.3(3)  |
| N(4)-C(9)  | 1.455(11) | N(5)-Ta(1)-N(2) | 100.7(3)  |
| N(5)-C(13) | 1.444(13) | O(1)-Ta(1)-N(2) | 73.7(2)   |
| N(5)-C(14) | 1.485(13) | N(1)-Ta(1)-N(2) | 142.3(3)  |
| N(6)-C(16) | 1.494(14) | H(1)-Ta(2)-O(1) | 79(3)     |
| N(6)-C(15) | 1.525(18) | H(1)-Ta(2)-N(6) | 79(3)     |
| N(7)-C(17) | 1.450(15) | O(1)-Ta(2)-N(6) | 157.2(3)  |
| N(7)-C(18) | 1.545(18) | H(1)-Ta(2)-N(7) | 162(2)    |
| N(8)-C(19) | 1.435(16) | O(1)-Ta(2)-N(7) | 101.4(3)  |
| N(8)-C(20) | 1.503(13) | N(6)-Ta(2)-N(7) | 100.8(4)  |
| N(9)-C(21) | 1.441(12) | H(1)-Ta(2)-N(3) | 103(2)    |
| C(5)-C(8)  | 1.508(16) | O(1)-Ta(2)-N(3) | 74.7(3)   |

|                  |          |                    |           |
|------------------|----------|--------------------|-----------|
| N(6)-Ta(2)-N(3)  | 108.4(3) | Ta(3)-N(3)-Ta(2)   | 92.8(3)   |
| N(7)-Ta(2)-N(3)  | 94.6(4)  | C(9)-N(4)-Ta(1)    | 169.7(7)  |
| H(1)-Ta(2)-N(1)  | 73(2)    | C(13)-N(5)-C(14)   | 107.0(8)  |
| O(1)-Ta(2)-N(1)  | 76.9(3)  | C(13)-N(5)-Ta(1)   | 126.8(7)  |
| N(6)-Ta(2)-N(1)  | 98.4(3)  | C(14)-N(5)-Ta(1)   | 126.2(7)  |
| N(7)-Ta(2)-N(1)  | 89.5(4)  | C(16)-N(6)-C(15)   | 110.6(10) |
| N(3)-Ta(2)-N(1)  | 151.5(3) | C(16)-N(6)-Ta(2)   | 125.6(9)  |
| N(9)-Ta(3)-N(8)  | 101.9(4) | C(15)-N(6)-Ta(2)   | 123.8(8)  |
| N(9)-Ta(3)-O(1)  | 99.8(3)  | C(17)-N(7)-C(18)   | 106.6(11) |
| N(8)-Ta(3)-O(1)  | 158.1(3) | C(17)-N(7)-Ta(2)   | 133.5(10) |
| N(9)-Ta(3)-N(3)  | 112.9(3) | C(18)-N(7)-Ta(2)   | 119.0(7)  |
| N(8)-Ta(3)-N(3)  | 100.1(4) | C(19)-N(8)-C(20)   | 107.9(10) |
| O(1)-Ta(3)-N(3)  | 73.8(3)  | C(19)-N(8)-Ta(3)   | 126.9(7)  |
| N(9)-Ta(3)-N(2)  | 107.7(3) | C(20)-N(8)-Ta(3)   | 125.1(8)  |
| N(8)-Ta(3)-N(2)  | 95.7(4)  | C(21)-N(9)-Ta(3)   | 171.2(7)  |
| O(1)-Ta(3)-N(2)  | 74.8(3)  | N(3)-C(5)-C(8)     | 109.5(9)  |
| N(3)-Ta(3)-N(2)  | 131.9(3) | N(3)-C(5)-C(6)     | 106.3(9)  |
| Ta(2)-O(1)-Ta(3) | 103.0(3) | C(8)-C(5)-C(6)     | 107.9(11) |
| Ta(2)-O(1)-Ta(1) | 94.1(2)  | N(3)-C(5)-C(7)     | 111.4(9)  |
| Ta(3)-O(1)-Ta(1) | 108.4(2) | C(8)-C(5)-C(7)     | 110.6(11) |
| C(1)-N(1)-C(2)   | 111.6(9) | C(6)-C(5)-C(7)     | 110.9(11) |
| C(1)-N(1)-Ta(1)  | 110.2(7) | N(4)-C(9)-C(10B)   | 116.2(13) |
| C(2)-N(1)-Ta(1)  | 116.8(7) | N(4)-C(9)-C(11)    | 116.2(14) |
| C(1)-N(1)-Ta(2)  | 116.3(7) | C(10B)-C(9)-C(11)  | 118.7(17) |
| C(2)-N(1)-Ta(2)  | 114.1(7) | N(4)-C(9)-C(12B)   | 109.2(14) |
| Ta(1)-N(1)-Ta(2) | 85.5(3)  | C(10B)-C(9)-C(12B) | 108.9(9)  |
| C(4)-N(2)-C(3)   | 106.1(9) | C(11)-C(9)-C(12B)  | 81.1(12)  |
| C(4)-N(2)-Ta(1)  | 112.5(7) | N(4)-C(9)-C(10)    | 107.9(10) |
| C(3)-N(2)-Ta(1)  | 112.9(8) | C(10B)-C(9)-C(10)  | 24.3(10)  |
| C(4)-N(2)-Ta(3)  | 111.2(7) | C(11)-C(9)-C(10)   | 108.7(8)  |
| C(3)-N(2)-Ta(3)  | 113.8(7) | C(12B)-C(9)-C(10)  | 131.6(14) |
| Ta(1)-N(2)-Ta(3) | 100.5(3) | N(4)-C(9)-C(12)    | 108.8(12) |
| C(5)-N(3)-Ta(3)  | 133.5(7) | C(10B)-C(9)-C(12)  | 82.2(11)  |
| C(5)-N(3)-Ta(2)  | 131.9(6) | C(11)-C(9)-C(12)   | 108.5(8)  |

|                     |           |                     |           |
|---------------------|-----------|---------------------|-----------|
| C(12B)-C(9)-C(12)   | 31.4(10)  | C(22B)-C(21)-C(24)  | 76.7(15)  |
| C(10)-C(9)-C(12)    | 106.5(8)  | C(23)-C(21)-C(24)   | 108.5(8)  |
| N(4)-C(9)-C(11B)    | 107.4(15) | C(24B)-C(21)-C(24)  | 34.6(14)  |
| C(10B)-C(9)-C(11B)  | 107.9(9)  | N(9)-C(21)-C(22)    | 108.1(11) |
| C(11)-C(9)-C(11B)   | 25.6(12)  | C(22B)-C(21)-C(22)  | 31.6(14)  |
| C(12B)-C(9)-C(11B)  | 106.7(9)  | C(23)-C(21)-C(22)   | 108.4(8)  |
| C(10)-C(9)-C(11B)   | 90.4(12)  | C(24B)-C(21)-C(22)  | 137.0(19) |
| C(12)-C(9)-C(11B)   | 132.5(15) | C(24)-C(21)-C(22)   | 107.5(8)  |
| N(9)-C(21)-C(22B)   | 114.3(17) | N(9)-C(21)-C(23B)   | 109.1(19) |
| N(9)-C(21)-C(23)    | 112.5(12) | C(22B)-C(21)-C(23B) | 108.7(10) |
| C(22B)-C(21)-C(23)  | 126.3(18) | C(23)-C(21)-C(23B)  | 29.1(15)  |
| N(9)-C(21)-C(24B)   | 107(2)    | C(24B)-C(21)-C(23B) | 108.3(10) |
| C(22B)-C(21)-C(24B) | 109.4(10) | C(24)-C(21)-C(23B)  | 132(2)    |
| C(23)-C(21)-C(24B)  | 80.0(16)  | C(22)-C(21)-C(23B)  | 82.9(14)  |
| N(9)-C(21)-C(24)    | 111.7(12) |                     |           |

---

Symmetry transformations used to generate equivalent atoms

**Table S9.** Anisotropic displacement parameters ( $\text{Å}^2 \times 10^3$ ) for **4**. The anisotropic displacement factor exponent takes the form:  $-2\pi^2[h^2a^*2U^{11} + \dots + 2hka^*b^*U^{12}]$ .

|       | $U^{11}$ | $U^{22}$ | $U^{33}$ | $U^{23}$ | $U^{13}$ | $U^{12}$ |
|-------|----------|----------|----------|----------|----------|----------|
| Ta(1) | 27(1)    | 33(1)    | 24(1)    | -4(1)    | -1(1)    | 7(1)     |
| Ta(2) | 36(1)    | 24(1)    | 31(1)    | 4(1)     | -2(1)    | -2(1)    |
| Ta(3) | 37(1)    | 24(1)    | 24(1)    | 1(1)     | -2(1)    | -3(1)    |
| O(1)  | 27(3)    | 25(3)    | 36(3)    | 0(2)     | 4(2)     | 2(2)     |
| N(1)  | 40(4)    | 44(4)    | 36(4)    | 4(3)     | 9(3)     | -3(4)    |
| N(2)  | 31(4)    | 40(4)    | 30(3)    | -6(3)    | -8(3)    | -4(3)    |
| N(3)  | 42(4)    | 21(3)    | 43(4)    | -9(3)    | -6(3)    | -4(3)    |
| N(4)  | 35(4)    | 50(5)    | 23(3)    | -4(3)    | -4(3)    | 18(3)    |
| N(5)  | 36(4)    | 43(4)    | 35(4)    | 1(3)     | 6(3)     | 16(4)    |
| N(6)  | 64(6)    | 28(4)    | 43(5)    | 4(3)     | 2(4)     | 11(4)    |
| N(7)  | 51(5)    | 40(4)    | 59(5)    | 6(4)     | 2(5)     | -20(4)   |
| N(8)  | 65(6)    | 37(4)    | 47(5)    | 13(4)    | 10(4)    | 8(4)     |
| N(9)  | 54(5)    | 22(3)    | 31(4)    | 9(3)     | -12(3)   | 0(3)     |
| C(1)  | 44(6)    | 75(8)    | 49(6)    | 4(6)     | 17(5)    | 2(6)     |
| C(2)  | 80(9)    | 64(7)    | 35(5)    | 12(5)    | -5(6)    | -3(6)    |
| C(3)  | 25(5)    | 124(12)  | 48(6)    | -16(8)   | 9(4)     | -16(6)   |
| C(4)  | 65(7)    | 43(5)    | 52(6)    | -10(5)   | -1(6)    | -24(5)   |
| C(5)  | 62(7)    | 33(5)    | 46(6)    | -13(4)   | -6(5)    | -3(5)    |
| C(6)  | 97(11)   | 63(8)    | 58(7)    | -21(6)   | -51(7)   | 7(8)     |
| C(7)  | 112(12)  | 60(7)    | 29(5)    | -17(5)   | 15(6)    | -21(8)   |
| C(8)  | 77(9)    | 38(6)    | 66(7)    | -15(5)   | -14(7)   | -1(6)    |
| C(9)  | 40(5)    | 84(8)    | 28(4)    | -8(5)    | -10(4)   | 19(5)    |
| C(13) | 41(6)    | 52(6)    | 74(8)    | -13(6)   | -8(6)    | 20(5)    |
| C(14) | 69(8)    | 47(6)    | 52(6)    | -14(5)   | -4(6)    | 34(6)    |
| C(15) | 77(10)   | 56(8)    | 94(11)   | -6(7)    | -12(8)   | 24(7)    |
| C(16) | 100(11)  | 20(4)    | 68(8)    | 4(4)     | -9(7)    | -4(5)    |
| C(17) | 87(11)   | 88(11)   | 76(9)    | 6(8)     | 19(9)    | -49(10)  |
| C(18) | 54(7)    | 84(10)   | 84(9)    | -34(8)   | -17(7)   | -20(7)   |
| C(19) | 62(7)    | 54(7)    | 63(7)    | -1(6)    | 22(6)    | -4(6)    |

|       |        |       |       |       |        |        |
|-------|--------|-------|-------|-------|--------|--------|
| C(20) | 88(10) | 60(7) | 44(6) | 24(5) | 18(6)  | -13(7) |
| C(21) | 56(7)  | 37(5) | 62(7) | 7(5)  | -18(5) | 12(5)  |

---



**Table S10.** Hydrogen coordinates ( $\times 10^4$ ) and isotropic displacement parameters ( $\text{\AA}^2 \times 10^3$ ) for **4**.

|        | x    | y     | z     | $U(\text{eq})$ |
|--------|------|-------|-------|----------------|
| H(1A)  | 9262 | 10754 | -204  | 84             |
| H(1B)  | 8622 | 9950  | -422  | 84             |
| H(1C)  | 9172 | 10038 | 230   | 84             |
| H(2A)  | 6655 | 10885 | -715  | 89             |
| H(2B)  | 7166 | 11580 | -311  | 89             |
| H(2C)  | 5613 | 11201 | -218  | 89             |
| H(3A)  | 2889 | 8955  | 1456  | 99             |
| H(3B)  | 2764 | 8805  | 776   | 99             |
| H(3C)  | 3092 | 9652  | 1012  | 99             |
| H(4C)  | 4527 | 7920  | 670   | 80             |
| H(4D)  | 4486 | 7883  | 1360  | 80             |
| H(4E)  | 5992 | 7973  | 1031  | 80             |
| H(6A)  | 9234 | 10913 | 2562  | 108            |
| H(6B)  | 8323 | 10269 | 2893  | 108            |
| H(6C)  | 8497 | 11107 | 3170  | 108            |
| H(7A)  | 5600 | 10450 | 2980  | 100            |
| H(7B)  | 4878 | 11181 | 2675  | 100            |
| H(7C)  | 5868 | 11294 | 3235  | 100            |
| H(8A)  | 6396 | 12089 | 2115  | 90             |
| H(8B)  | 8098 | 11955 | 2076  | 90             |
| H(8C)  | 7385 | 12224 | 2672  | 90             |
| H(10A) | 1909 | 10038 | 38    | 82             |
| H(10B) | 1540 | 10406 | -578  | 82             |
| H(10C) | 2874 | 10724 | -212  | 82             |
| H(11A) | 2056 | 8740  | -419  | 117            |
| H(11B) | 3034 | 8622  | -981  | 117            |
| H(11C) | 1621 | 9146  | -1014 | 117            |
| H(12A) | 4522 | 10477 | -1060 | 104            |
| H(12B) | 3040 | 10271 | -1377 | 104            |

|        |       |       |       |     |
|--------|-------|-------|-------|-----|
| H(12C) | 4355  | 9678  | -1397 | 104 |
| H(10D) | 1966  | 10431 | -185  | 82  |
| H(10E) | 1934  | 10533 | -872  | 82  |
| H(10F) | 3271  | 10851 | -508  | 82  |
| H(11D) | 2093  | 8957  | -79   | 117 |
| H(11E) | 2522  | 8563  | -679  | 117 |
| H(11F) | 1264  | 9191  | -659  | 117 |
| H(12D) | 3709  | 9057  | -1348 | 104 |
| H(12E) | 4800  | 9760  | -1263 | 104 |
| H(12F) | 3189  | 9917  | -1479 | 104 |
| H(13A) | 9251  | 8500  | -11   | 84  |
| H(13B) | 8387  | 7851  | 336   | 84  |
| H(13C) | 8650  | 8676  | 624   | 84  |
| H(14A) | 6715  | 7662  | -390  | 84  |
| H(14B) | 7649  | 8242  | -774  | 84  |
| H(14C) | 5958  | 8383  | -695  | 84  |
| H(15A) | 4039  | 11907 | 440   | 113 |
| H(15B) | 3974  | 12428 | 1010  | 113 |
| H(15C) | 3840  | 11513 | 1060  | 113 |
| H(16A) | 6158  | 13012 | 1110  | 94  |
| H(16B) | 6505  | 12824 | 447   | 94  |
| H(16C) | 7646  | 12607 | 939   | 94  |
| H(17A) | 10786 | 11481 | 571   | 125 |
| H(17B) | 10050 | 12226 | 849   | 125 |
| H(17C) | 9335  | 11819 | 299   | 125 |
| H(18A) | 10762 | 11250 | 1611  | 111 |
| H(18B) | 10651 | 10466 | 1252  | 111 |
| H(18C) | 9573  | 10623 | 1778  | 111 |
| H(19A) | 3016  | 10133 | 2709  | 89  |
| H(19B) | 2327  | 9536  | 2262  | 89  |
| H(19C) | 3238  | 10254 | 2030  | 89  |
| H(20A) | 3352  | 8660  | 2880  | 96  |
| H(20B) | 4503  | 9166  | 3226  | 96  |
| H(20C) | 5032  | 8467  | 2829  | 96  |

|        |          |           |         |       |
|--------|----------|-----------|---------|-------|
| H(22A) | 7460     | 7162      | 1973    | 94    |
| H(22B) | 6751     | 7423      | 2572    | 94    |
| H(22C) | 8322     | 7046      | 2565    | 94    |
| H(23A) | 9675     | 8810      | 2811    | 116   |
| H(23B) | 9305     | 7982      | 3073    | 116   |
| H(23C) | 8136     | 8657      | 3099    | 116   |
| H(24A) | 9215     | 8136      | 1468    | 124   |
| H(24B) | 10056    | 7608      | 1922    | 124   |
| H(24C) | 10266    | 8522      | 1933    | 124   |
| H(22D) | 8189     | 7360      | 1648    | 94    |
| H(22E) | 7293     | 7136      | 2214    | 94    |
| H(22F) | 9009     | 7059      | 2212    | 94    |
| H(23D) | 8678     | 8653      | 3095    | 116   |
| H(23E) | 8834     | 7737      | 3092    | 116   |
| H(23F) | 7271     | 8123      | 3075    | 116   |
| H(24D) | 9797     | 8535      | 1678    | 124   |
| H(24E) | 10539    | 8179      | 2242    | 124   |
| H(24F) | 9871     | 9027      | 2261    | 124   |
| H(1)   | 5170(90) | 10530(50) | 760(30) | 7(19) |

---
